[Type text]

1 ***Molecular epidemiology of Japanese Encephalitis Virus in pig population of Odisha,***  
2 ***Assam and Manipur states of India.***

3 Ankita Datey<sup>1¶</sup>, Leichombam Mohindro Singh<sup>2¶</sup>, Uttam Rajkhowa<sup>3¶</sup>, Birendra Kumar Prusty<sup>4</sup>,  
4 Tanuja Saswat<sup>1</sup>, Prabhudutta Mamidi<sup>1</sup>, Luit Moni Barkalita<sup>3</sup>, Rupam Dutta<sup>3</sup>, K Chandradev  
5 Sharma<sup>2</sup>, Dinabandhu Sahoo<sup>5</sup>, Probodh Borah<sup>3\*</sup>, Sarangthem Indira Devi<sup>2\*</sup>, and Soma  
6 Chattopadhyay<sup>1\*</sup>

7 <sup>1</sup>Infectious Disease Biology, Institute of Life Sciences, Bhubaneswar, India

8 <sup>2</sup>Microbial Resources Division, Institute of Bioresources and Sustainable Development,  
9 Imphal, India

10 <sup>3</sup>Department of Animal Biotechnology, College of Veterinary Science, Assam Agricultural  
11 University, Guwahati, India

12 <sup>4</sup>Officer in Charge District Diagnostic Laboratory, Malkangiri, India

13 <sup>5</sup>Bioenergy Division, Institute of Bioresources and Sustainable Development, Imphal, India

14 <sup>¶</sup>Equal Contribution

15 <sup>\*</sup>Corresponding authors

16 Email: sochat.ils@gmail.com (SC)

17 E-mail: borahp@vetbifg.ac.in (PB)

18 Email: sidevil@yahoo.co.in (SD)

19

20

[Type text]

## 21 **Abstract**

22 Japanese encephalitis virus (JEV) comes under the family *Flaviviridae* and genus flavivirus.  
23 It predominantly infects the children under the age of 10 years and the case fatality rate can  
24 stretch out as high as 30%. Pigs act as reservoir and amplifying intermediate host for JEV.  
25 Recent report suggested longer persistence of JEV in tonsil than in circulation of  
26 experimentally infected pigs. The current investigation was conducted to understand the  
27 prevalence and molecular epidemiology of JEV infection in pigs in three different  
28 geographical sites in India (Odisha, Assam and Manipur). Serum samples were tested by  
29 ELISA and RT-PCR for detection of JEV, while only RT-PCR was done in case of tonsils  
30 tissues collected from pigs slaughtered in abattoir. Prevalence of JEV was highest in Manipur  
31 (25.45% in serum and 10.08% in tonsil) but lower in Assam (3.75% in serum and 0% in  
32 tonsils) and Odisha (1.49% in serum and 3.7% in tonsils). The percentage of sero-positivity  
33 was found to be 3.75% of IgM and 9.9% of IgG in Assam and Odisha respectively. Genotype  
34 III (GIII) of JEV was the dominant genotype and sporadic mutations of S83G, H76P, E78Q,  
35 C55S, and S64W along with two consistent mutations V46S and V51I were observed in all  
36 the GIII strains. Analysis of the E gene sequence revealed a single mutation, S118N in the GI  
37 strain. Older pigs (above 7 months) were found to be infected relatively more (8.6%) than  
38 younger pigs (age group 3-7 months). In conclusion, the high JE virus infection rate of pig in  
39 the current locations suggests the need for continuous surveillance of this virus in pigs which  
40 will ultimately help to adopt an effective control strategy to prevent the spread of JE infection  
41 to human.

42

43

44

[Type text]

## 45 **Author summary**

46 Japanese encephalitis is one of the contributing factors in acute encephalitis syndrome cases  
47 reported across India as well as Asia. Primarily young naive human population are affected  
48 with JEV. The death rate can be as high as 30% and in about 30%-50% surviving population  
49 paralysis, brain damage or other serious permanent sequelae may be observed. The viral load  
50 gets amplified in pigs and thus plays a crucial role in transmitting the infection in human  
51 communities living in close proximity to pig dwelling. The current study was conducted to  
52 demonstrate prevalence of JEV in pig population of three geographical regions of India viz.  
53 the States of Odisha, Assam and Manipur that have reported JE outbreaks in human  
54 population. The current study demonstrates that the rate of infection is 3.28% among pigs in  
55 Manipur followed by Assam and Odisha. GIII was found to be the most predominant JEV  
56 genotype, while only one GI genotype strain was detected from Odisha region. These  
57 findings suggested the need of continuous surveillance of this virus in pigs and proper  
58 implementation of human and animal vaccination programme to control the infection.

59

60

61

62

63

64

65

66

[Type text]

## 67 **Introduction**

68 Flaviviruses are important human and animal pathogens with worldwide distribution.  
69 Japanese encephalitis virus (JEV), belonging to this family particularly affects the children  
70 below 10 years and the mortality rate can be upto 30% [1] and about 30%-50% of survivors  
71 develop permanent neurologic disorder or psychiatric sequelae [2]. JEV is a single stranded  
72 RNA virus with a genome length of approximately 11kb. The genome is divided into a  
73 structural region containing capsid (C), pre-membrane (prM) and envelope (E) genes and a  
74 non-structural region consisting of NS1, NS2a, NS2b, NS3, NS4a, NS4b and NS5 genes [3].  
75 The NS3 and NS5 genes encode for viral helicase and polymerase enzymes respectively  
76 whereas the functions of NS4a and NS4b are not clearly understood [4]. *Culex*  
77 *tritaeniorhyncus* is the dominant transmitting vector [5] whereas other species of mosquitoes  
78 namely *Culex modestus* [6], *Culex pipiens* [7], *Culex bitaeniorhyncus* [7] and *Anopheles*  
79 *sinensis* [8] have also been reported. In nature, JEV maintains its life cycle between vectors  
80 and reservoir hosts such as pigs, wading birds and bats [2] from where the virus is transmitted  
81 to the dead end hosts such as humans and horses which do not develop high viremia to infect  
82 mosquito hosts [9, 10]. Similarly, JEV infection to pregnant sows leads to reproductive  
83 failures such as abortions and stillbirths [11]. In South East Asia, JEV transmission is mainly  
84 associated with the onset of rainy season but it can occur throughout the year in tropical  
85 regions [4].

86 The JEV strains have been characterized genetically depending upon the limited sequencing  
87 of C/prM, E and NS5/3' UTR regions, while based on their evolutionary divergence JEV  
88 genotypes are further categorized into GI (GI-a and GI-b), GII, GIII, GIV and GV [12, 13]. A  
89 single serotype exists for all the JEV genotypes [14]. The Nakayama and Beijing-1 prototype  
90 strains and all other strains isolated from pigs and mosquitoes before 1994 belong to GIII

[Type text]

91 [15]. However, there are reports indicating recent introduction of GI strain in pigs and  
92 mosquitoes [16, 17]. It has also been reported that GI has slowly replaced GIII strain and can  
93 become a dominant genotype because of contribution of several viral, environmental and host  
94 factors [18]. Moreover, the GI genotype has equal virulence as that of GIII and is responsible  
95 for encephalitis in humans in most Asian countries including India [12]. Earlier reports  
96 suggested that GIII is the most prevalent genotype in India [19], though there are reports  
97 suggesting the presence of GI in Uttar Pradesh [20] and West Bengal [21]. The main cause of  
98 viral encephalitis in Asia is JEV. The transmission of JEV is endemic in around 24 countries  
99 of South East Asia and Western Pacific regions [22]. More than 3 billion people are at risk of  
100 JEV infection with approximately 68,000 clinical cases reported every year [23]. JEV  
101 epidemics among human was first reported in Haryana, India in 1990 [24] and a major  
102 outbreak was reported from Gorakhpur in Uttar Pradesh, India in 2005 [1]. Subsequent  
103 outbreaks also occurred in Malkangiri in 2012 and Manipur in 2016 [4]. Most of the  
104 epidemics occurred in the first to third weeks of October in a year [1]. The common clinical  
105 manifestations include fever (temperature 38.5°C-40°C), severe headache, convulsions,  
106 vomiting and in extreme cases the infections leads to paralysis, coma and death [1].  
107 According to National Vector Borne Diseases Control Programme, 216 deaths were reported  
108 out of approximately 1731 cases in 2015.

109 JE is mainly reported in the rural areas as most of the Indian population relies on agriculture  
110 and the agricultural grounds serve as a potent place for mosquito breeding. As the vector  
111 remains in close proximity to its reservoir hosts, this significantly increases the risk of JE  
112 transmission to human as well as other hosts such as horses [1]. Pigs are the prime suspects as  
113 reservoir for disease transmission [25] and the high viral titer in peripheral blood of pigs  
114 ensures transmission of infection to susceptible naive young human population through  
115 mosquito bite. Reports also suggest, the transmission of virus from infected to uninfected

[Type text]

116 pigs occurring through mosquitoes [26]. Recent reports indicates the vector free transmission  
117 of JEV through the oronasal secretion of infected pigs to naive pigs [25].

118 There are several reports regarding the mosquito studies in the JE endemic regions of India,  
119 however studies on reservoir hosts is limited [19]. As investigating the JEV persistence in the  
120 pig population is of utmost importance to take the necessary precautionary measures before  
121 the onset of fatal situation, this investigation was conducted to study the molecular  
122 epidemiology of JEV in the pig population of JE endemic regions of Odisha, Assam and  
123 Manipur in India.

## 124 **Materials and methods**

### 125 **Sample collection**

126 Blood and tonsil tissue from slaughtered pigs were collected from the endemic regions of  
127 Odisha, Assam and Manipur from August 2017 - March 2019 (Fig 1). The animals used in  
128 the study were being processed as part of the normal work in the abattoir. The tissue and  
129 blood samples were collected by qualified practicing veterinarians from animals slaughtered  
130 in the abattoir as a part of the routine process after obtaining necessary consent for the same.

131 The serum was separated from the blood sample by centrifugation at 5000 rpm for 5 mins at  
132 4°C and aliquoted in properly labeled vials. Tonsil sample of around 1gram was collected  
133 from slaughtered pig and stored in RNA later (Ambion, Thermo Fischer Scientific, USA)  
134 [16]. Both the serum and the tonsil tissues were stored at -80°C until further processing.

135 Fig 1. Outline Map of India showing three different States of Odisha, Assam and Manipur.  
136 The colored areas represent the districts of different States to focus the exact location from  
137 where samples were collected ([https://commons.wikimedia.org/wiki/Atlas\\_of\\_the\\_world](https://commons.wikimedia.org/wiki/Atlas_of_the_world)).

138

[Type text]

### 139 **Viral RNA extraction from serum and RT-PCR**

140 The viral RNA was extracted from serum samples as referred by Desingu *et al*, 2016 [19].  
141 For this, 140µl of swine serum was used and extraction was done, using viral RNA isolation  
142 kit (QIAmp Viral RNA Mini Kit Qiagen, Germany) according to the manufacturer's protocol.  
143 The viral RNA was quantified and cDNA was prepared with random hexamers using 1µg of  
144 viral RNA by Superscript III first strand cDNA synthesis kit (Invitrogen, USA). This was  
145 followed by a PCR reaction using Taq DNA polymerase (Thermoscientific, USA) with initial  
146 denaturation at 95°C for 5 mins followed by 35 cycles of 95°C for 45 s, 45°C for 45 s and  
147 72°C for 30 s with the final extension of 10 mins, amplifying 400bp of envelope (E) gene  
148 using specific primers [27]. The amplified products were electrophoresed on 2% agarose gel  
149 and viewed under UV transilluminator.

### 150 **Total RNA extraction from tonsil tissue and RT-PCR**

151 The total RNA was extracted from tonsil tissue as per the method described by Mendez *et al*,  
152 2011 [28]. The tonsil tissue was homogenized in 500µl of TRIzol (Invitrogen, USA) by  
153 sterile homogenizer and total RNA was extracted using manual trizol extraction method and  
154 quantified. Approximately 1µg of total RNA was used to prepare cDNA with random  
155 hexamers using Superscript III first strand cDNA synthesis kit (Invitrogen, USA). The 400bp  
156 partial region of E gene was amplified as mentioned earlier.

### 157 **Serology**

158 The serum samples were also subjected to indirect ELISA to detect the presence of IgG  
159 antibodies against JEV using Porcine JE IgG ELISA Kit (Glory Science Co., Ltd, USA) in  
160 accordance with the manufacturer's instructions.

[Type text]

161 The IgM antibody detection against JEV in pig serum was also carried out by using Porcine  
162 Japanese Encephalitis IgM antibody (JE-IgM AB) ELISA kit (Genexbio Health Science Pvt.  
163 Ltd.) as per manufacturer's protocol.

#### 164 **Sequencing and phylogenetic analysis using E gene sequence**

165 The positive serum and tissue samples were subjected to bi-directional sequencing with  
166 overlapping primers using an automated DNA sequencer (Applied biosystem®3500 series  
167 genetic analyser), based on the Sanger's dye terminating method. The sequence obtained was  
168 analyzed for its correct identity using the BLAST tool of NCBI and confirmed.

169 The obtained sequences were aligned by the ClustalW tool [29] and the phylogenetic analysis  
170 was performed using the MEGA6.06 software [30]. The phylogenetic tree was constructed  
171 using the Neighbor-Joining method [31] and the evolutionary distances were compared using  
172 the maximum composite likelihood method [32]. The statistical significance of the  
173 phylogenetic tree was tested with a bootstrap value of 1000 pseudo-replicate datasets [33].

#### 174 **Mutational analysis**

175 The nucleotide sequences of the JEV E gene of the isolated strains were translated to protein  
176 sequences using the ExPASy translate tool (<https://web.expasy.org/translate/>). The sequences  
177 were then aligned with their respective prototype strain using the Clustal Omega tool  
178 (<https://www.ebi.ac.uk/Tools/msa/clustalo/>). The variations in the protein sequences were  
179 highlighted.

#### 180 **Accession numbers**

181 The E gene sequences (n=36) were submitted to GenBank database with accession numbers  
182 MK421340, MK940903, MK940904, MK940905, MN115386, MN115387, MK491507,  
183 MH376692, MK682387, MK692888, MK692889, MK692890, MK692891, MK692892,



[Type text]

184 MK692893, MK692894, MK518053, MK952776, MK952775, MK962309, MK962310,  
185 MK975821, MK975822, MK975823, MK975824, MN029019, MN010526, MN010527,  
186 MN010528, MN010529, MN029013, MN029014, MN029015, MN029016, MN029017,  
187 MN029018.

## 188 **Results**

189 In the present study, the total number of serum samples screened from Odisha, Assam and  
190 Manipur were 402, 400 and 55 respectively; whereas the corresponding numbers for tonsil  
191 samples were 27, 55 and 248. The number of JEV positive serum samples detected by means  
192 of RT-PCR was 6 out of 402 (1.49%), 15 out of 400 (3.75%) and 14 out of 55 (25.45%) and  
193 for tissue samples 1 out of 27 (3.7%), 0 out of 55 (0%) and 25 out of 248 (10.08%) in the  
194 respective States (Fig 2A and 2B). On the other hand, 15 out of 400 (3.75%) of IgM and 40  
195 out of 402 (9.9%) of IgG positive cases were reported from Assam and Odisha respectively.

196 Fig 2 Detection of JEV in samples of pig collected between August 2017-March 2019 by RT-  
197 PCR.

198 (A) Number of positive cases from the serum samples collected from pigs. (B) Positive  
199 number of cases from the tonsils tissues collected from the slaughtered pigs.

### 200 **District-wise distribution of JE positive cases**

201 As per the district-wise distribution for all the three states, the overall prevalence of JEV for  
202 serum samples was found to be 1.49% in Malkangiri, 25.45% in Imphal West, whereas  
203 3.33% in Jorhat, 5.71% in Lakhimpur, 4.00% in Dhemaji and 1.67% in Kamrup (S1A Table).  
204 Besides this, percentage of positivity for tonsils tissues by RT-PCR were found to be 3.7% in  
205 Malkangiri, 8.23% in Imphal West, 35.89% in Imphal East, 3.4% in Kakching and 100% in  
206 Bishnupur (S1B Table). However, district wise distribution was not available for Assam

[Type text]

207 tonsil samples. Further, there was not a single positive case for tonsil sample by RT-PCR in  
208 Assam (S1B Table).

### 209 **Age, month and sex-wise distribution of positive cases of JE in pigs detected by RT-PCR**

210 The number of JEV positive cases detected in pig serum in the above mentioned states was  
211 found to be 5.21%, 1.67% and 77.7% respectively for the age group 3-7 months, whereas  
212 above 7 months, it was found to be 0%, 6.88% and 15.2%, respectively in Odisha, Assam and  
213 Manipur (Fig 3A and 3B). However, for tonsil samples from Manipur 11.12% (3 out of 27)  
214 was found to be positive under age group 3-7 months, whereas 9.95% (22 out of 221) was  
215 found positive in the age group above 7 months. Details regarding age-wise distribution of  
216 positive cases in respect of tonsil samples were not available for Odisha and Assam. In the  
217 current study, in Odisha more number of positive cases was found during the pre-monsoon  
218 season whereas in Assam, number of positive cases was more during monsoon and post-  
219 monsoon periods. The sex-wise distribution of JEV serum positive cases in the three states  
220 were 1.85%, 2.56 % and 40.0% in males, and 7.93%, 4.88%, 8.0% in females (Fig 4A and  
221 4B). Similar details in respect of tonsil samples were not known for all the three states.

222 Fig 3. Age-wise distribution of RT-PCR positive JEV cases detected from pig serum.

223 (A) Positive number of cases under age group 3-7 months. (B) Number of positive cases  
224 above the age of 7 months

225 Fig 4 Sex-wise distribution of RT-PCR positive JEV in pig serum.

226 (A)Number of RT-PCR positive male cases. (B) Number of RT-PCR positive females cases.

### 227 **Sequencing and phylogenetic analysis**

[Type text]

228 In the present study, a total of 61 samples including serum and tonsil were found to be  
229 positive by RT-PCR. The PCR products which were found positive were confirmed by  
230 sequencing. Out of 61 positive samples 36 sequences were submitted to the GenBank. All the  
231 strains bearing GenBank accession numbers are listed in Table S2.

232 The genotype I and III strains were found to be circulating among the pigs of the three states  
233 under study, of which, genotype III was found to be the predominant one. The genotype III  
234 strains (n=60) were found in all the three States whereas a single case of genotype I (n=1)  
235 was reported from Malkangiri district of Odisha.

236 The phylogenetic tree was constructed with reference JEV strains of genotype I (n=19),  
237 genotype II (n=2), genotype III (n=6), genotype IV (n=2) and genotype V (n=2) including the  
238 strains isolated in the present study. All of the isolated strains in the present study were  
239 clustered into genotype I and genotype III. The isolated strain with accession number  
240 MK421340 clustered with the other GI strains reported from Vietnam, India, Korea, China,  
241 Taiwan and Japan (Fig 5). However, the rest of the strains clustered in genotype III including  
242 the prototype Nakayama strain.

243 Fig 5. The phylogenetic analysis of the E gene of JEV strains from pigs. The phylogenetic  
244 tree was constructed using neighbor-joining method with 1000 bootstrap value by the  
245 MEGA6.06 software. The reference strains of GI, GII, GIII, GIV and GV were obtained from  
246 the GenBank database. Viruses are depicted by accession number/country/year of isolation.  
247 The close circle, close triangle and open square represents the Odisha, Assam and Manipur  
248 isolates respectively. The bootstrap values are indicated at major branch points and scale bar  
249 indicates nucleotide substitution per sites.

250 **Presence of mutations in the isolated strains**

[Type text]

251 The amino acid sequence of the translated protein coded by the E gene of the detected GI  
252 strain was aligned with that of the respective prototype strain as well as to the strain isolated  
253 from human in 2005 from Gorakhpur, India using the Clustal Omega tool. It was noticed that  
254 the JEV GI strain isolated from Odisha was approximately 99% identical with a single  
255 mutation (S118N) observed within the amino acid region of 1-156 of the E gene (S3A Table  
256 and S1A Fig). Similarly, after the alignment of GIII E amino acid sequences with the  
257 prototype strain, it was observed that they were approximately 96-98% identical. The  
258 sequence analysis showed the presence of two consistent mutations V46S and V51I in all the  
259 GIII strains of the present study. Further, S83G mutation was observed in five Assam strains,  
260 two mutations S64W and H76P were observed in strain with accession number MH376692,  
261 whereas a single mutation E78Q was observed in Odisha strain (MK491507) and C55S  
262 mutation was found in Manipur strain (MK518053) (S3B Table and S1B Fig).

## 263 **Discussion**

264 Pigs act as an amplifier host of JEV, thus can be a key suspect of spreading infection to  
265 human living in close proximity [4]. The detection of JEV in pigs was reported earlier from  
266 Cambodia, Singapore, Vietnam, Australia, Japan, China, Thailand, Laos, Indonesia, India etc  
267 (Fig 6) [22, 34-42], however the studies on pigs for the presence of JE virus and its genotypes  
268 in circulation among pigs in India are limited [19]. Hence, the current investigation was  
269 mainly focused on the JE virus detection in pig serum and tonsil in three different JE endemic  
270 states of India namely Odisha, Assam and Manipur.

271 Fig 6. The World map showing reported cases of JEV detection in pig population  
272 ([https://commons.wikimedia.org/wiki/Atlas\\_of\\_the\\_world](https://commons.wikimedia.org/wiki/Atlas_of_the_world)).

273 In the current investigation, a large number of JE positive cases were detected among pigs in  
274 Manipur State of India, as compared to the other two states. Moreover, it was noticed that the

[Type text]

275 genotype III strain was predominant in all the three states with a single case of genotype I in  
276 Odisha.

277 In the present study, high sero-positivity was observed in pigs from the districts of Odisha,  
278 Assam and Manipur. There are reports that *Culex tritaeniorhynchus* acts as a transmitting  
279 vector and majorly found around the pig farming areas throughout the year. There are reports  
280 which suggest that the pigs are the potential feeding hosts for *Culex tritaeniorhynchus* [43,  
281 44]. The presence of virus in tissue sample suggests that the virus can also invade tonsil  
282 tissue along with CNS as was reported earlier [25]. According to previous reports, in  
283 experimental JEV infected pigs, the viral load was noticed to be highest in tonsils as  
284 compared to other secondary lymphoid organs as well as CNS. In tonsils, even after 11 days  
285 of post infection no significant reduction was observed in viral RNA. Further, live virus was  
286 also detected in tonsil tissues [25].

287 The higher percentage of positive cases detected in Manipur (Imphal West district) and  
288 Assam (Lakhimpur district) might be due to larger pig population of the north eastern regions  
289 of India [45]. The male pigs were found to be infected more with JE virus compared to  
290 females. Moreover, the rate of infection was higher in the pigs above 7 months of age  
291 compared to 3-7 months. Pigs over 11 months of age were also found positive for JEV in  
292 Cambodia [46]. It might be due to pig to pig transmission through oronasal route in pig  
293 rearing farms [25]. The JE positivity was observed throughout the year in the current study  
294 with slight increase during the monsoon and post-monsoon periods. Earlier reports also  
295 suggested that the JE detection goes up during the monsoon and the virus can be detected in  
296 pig throughout the year in tropical regions [4].

297 Here, the genotype III strain was found to be circulating predominantly among pig population  
298 of the three states. This was reported earlier that genotype III is the most prevalent strain in

[Type text]

299 pig population of India as well as other parts of Asia such as China [19, 47]. Interestingly, a  
300 single strain of genotype I was detected in pig population of Odisha. There are reports which  
301 indicate the recent introduction of genotype I in human in India [20], however GI JEV strain  
302 has never been detected previously from pig. The presence of genotype I was also reported  
303 from other parts of Asia, suggesting it as an emerging strain [15]. The highest nucleotide  
304 identity for the GenBank submitted sequence of genotype I (GenBank Accession number  
305 MK421340) was found to be 99.74% with Yunan isolate YNTC07290. Whereas, for  
306 genotype III the submitted sequences of GenBank showed highest nucleotide identity of  
307 approximately 99% with Indian isolate JEV/SW/IVRI/395A/2014. As reported earlier also,  
308 genetic diversity is low for the E gene at nucleotide and amino acid level [23]. The  
309 mutational analysis showed a single mutation in GI strain, whereas sporadic mutations along  
310 with two consistent mutations were observed for all the GIII strains.

311 In the present investigation, paired samples of serum and tonsil could not be collected due to  
312 operational issues in the abattoir, which could have offered better insights into the merit of  
313 testing tonsil tissue (if any) rather than serum samples for detection/quantification of JEV by  
314 RT-PCR. Further, a well-designed survey for JEV infection/disease prevalence in human and  
315 mosquito population during the study period would have allowed possibilities to correlate  
316 JEV infection in humans and pigs in the same geographical region.

317 The current study limited to three geographical sites has indicated that JEV prevalence in pigs  
318 can be very high in areas where human JEV outbreak has been reported. We suggest that JEV  
319 outbreaks in human population might be controlled by vaccinating pigs in areas of high  
320 prevalence of the viral load in the animal reservoir – a strategy that has not been widely  
321 adopted.

322 **Acknowledgement**

[Type text]

323 We are grateful to Dr Anirban Basu (NBRC, Haryana, India) for kindly providing the JEV  
324 strain, GP78. We are thankful to Dr Balachandran Ravindran for conceptualization, reviewing  
325 and editing the manuscript. We would like to thank Ujjwal Mahata and BirSingh Mahata for  
326 collecting the pig samples from Malkangiri region of Odisha. We are also grateful to  
327 Konthoujam Abung Meitei for providing samples from Imphal West district of Manipur.

## 328 **References**

- 329 1. Parida M, Dash PK, Tripathi NK. Japanese encephalitis outbreak, India, 2005.  
330 *Emerging Infectious Diseases*. 2006;12(9):1427.
- 331 2. Solomon T. Control of Japanese encephalitis—within our grasp? *New England*  
332 *Journal of Medicine*. 2006;355(9):869-71.
- 333 3. Lindenbach BD. The viruses and their replication. *Fields virology*. 2007:1101-52.
- 334 4. Kulkarni R, Sapkal GN, Kaushal H, Mourya DT. Suppl-2, M8: Japanese Encephalitis:  
335 A Brief Review on Indian Perspectives. *The open virology journal*. 2018;12:121.
- 336 5. Campbell GL, Hills SL, Fischer M, Jacobson JA, Hoke CH, Hombach JM, et al.  
337 Estimated global incidence of Japanese encephalitis: a systematic review. *Bulletin of the*  
338 *World Health Organization*. 2011;89:766-74.
- 339 6. Wang J, Fu S, Wang H, Mao X, Liu W, He Y, et al. Isolation and identification of  
340 Japanese encephalitis virus in Liaoning Province. *Zhonghua shi yan he lin chuang bing du*  
341 *xue za zhi= Zhonghua shiyan he linchuang bingduxue zazhi= Chinese journal of*  
342 *experimental and clinical virology*. 2006;20(1):61-5.
- 343 7. Seo H-J, Kim HC, Klein TA, Ramey AM, Lee J-H, Kyung S-G, et al. Molecular  
344 detection and genotyping of Japanese encephalitis virus in mosquitoes during a 2010  
345 outbreak in the Republic of Korea. *PloS one*. 2013;8(2):e55165.

[Type text]

- 346 8. Gong D, Guo X, Zhou H, Wang P. Investigation of the prevalence of Japanese  
347 encephalitis in Jingdong County, Yunnan. *Zhongguo Bingyuan Shengwuxue Zazhi/Journal of*  
348 *Pathogen Biology*. 2010;5(1):57-68.
- 349 9. Kuno G. Transmission of arboviruses without involvement of arthropod vectors. *Acta*  
350 *virologica*. 2001;45(3):139-50.
- 351 10. Mackenzie JS, Gubler DJ, Petersen LR. Emerging flaviviruses: the spread and  
352 resurgence of Japanese encephalitis, West Nile and dengue viruses. *Nature medicine*.  
353 2004;10(12s):S98.
- 354 11. Morimoto T, Kurogi H, Miura Y, Sugimori T, Fujisaki Y. Isolation of Japanese  
355 encephalitis virus and a hemagglutinating DNA virus from the brain of stillborn piglets.  
356 *Tokyo Nat Inst Anim Health Quart*. 1972.
- 357 12. Pan XL, Liu H, Wang HY, Fu SH, Liu HZ, Zhang HL, et al. Emergence of genotype I  
358 of Japanese encephalitis virus as the dominant genotype in Asia. *J Virol*. 2011;85(19):9847-  
359 53. doi: 10.1128/JVI.00825-11. PubMed PMID: 21697481; PubMed Central PMCID:  
360 PMC3196406.
- 361 13. Solomon T, Ni H, Beasley DW, Ekkelenkamp M, Cardoso MJ, Barrett AD. Origin  
362 and evolution of Japanese encephalitis virus in southeast Asia. *Journal of virology*.  
363 2003;77(5):3091-8.
- 364 14. Tsarev S, Sanders M, Vaughn D, Innis B. Phylogenetic analysis suggests only one  
365 serotype of Japanese encephalitis virus. *Vaccine*. 2000;18:36-43.
- 366 15. Do LP, Bui TM, Hasebe F, Morita K, Phan NT. Molecular epidemiology of Japanese  
367 encephalitis in northern Vietnam, 1964–2011: genotype replacement. *Virology journal*.  
368 2015;12(1):51.



[Type text]

- 369 16. Garjito TA, Prihatin MT, Susanti L, Prastowo D, Sa'adah SR, Taviv Y, et al. First  
370 evidence of the presence of genotype-1 of Japanese encephalitis virus in *Culex gelidus* in  
371 Indonesia. *Parasites & vectors*. 2019;12(1):19.
- 372 17. Nga PT, del Carmen Parquet M, Cuong VD, Ma S-P, Hasebe F, Inoue S, et al. Shift in  
373 Japanese encephalitis virus (JEV) genotype circulating in northern Vietnam: implications for  
374 frequent introductions of JEV from Southeast Asia to East Asia. *Journal of General Virology*.  
375 2004;85(6):1625-31.
- 376 18. Schuh AJ, Ward MJ, Brown AJL, Barrett AD. Dynamics of the emergence and  
377 establishment of a newly dominant genotype of Japanese encephalitis virus throughout Asia.  
378 *Journal of virology*. 2014;88(8):4522-32.
- 379 19. Desingu P, Ray PK, Patel B, Singh R, Singh R, Saikumar G. Pathogenic and  
380 genotypic characterization of a Japanese encephalitis virus isolate associated with  
381 reproductive failure in an Indian pig herd. *PloS one*. 2016;11(2):e0147611.
- 382 20. Fulmali PV, Sapkal GN, Athawale S, Gore MM, Mishra AC, Bondre VP.  
383 Introduction of Japanese encephalitis virus genotype I, India. *Emerging infectious diseases*.  
384 2011;17(2):319.
- 385 21. Sarkar A, Taraphdar D, Mukhopadhyay SK, Chakrabarti S, Chatterjee S. Molecular  
386 evidence for the occurrence of Japanese encephalitis virus genotype I and III infection  
387 associated with acute encephalitis in patients of West Bengal, India, 2010. *Virology journal*.  
388 2012;9(1):271.
- 389 22. Di Francesco J, Choeung R, Peng B, Pring L, Pang S, Duboz R, et al. Comparison of  
390 the dynamics of Japanese encephalitis virus circulation in sentinel pigs between a rural and a  
391 peri-urban setting in Cambodia. *PLoS neglected tropical diseases*. 2018;12(8):e0006644.

[Type text]

- 392 23. Fang Y, Zhang Y, Zhou Z-B, Xia S, Shi W-Q, Xue J-B, et al. New strains of Japanese  
393 encephalitis virus circulating in Shanghai, China after a ten-year hiatus in local mosquito  
394 surveillance. *Parasites & vectors*. 2019;12(1):22.
- 395 24. Sharma R, Saxena V, Bharadwaj M, Sharma R, Verghese T, Datta K. An outbreak of  
396 Japanese encephalitis in Haryana--1990. *The Journal of communicable diseases*.  
397 1991;23(2):168.
- 398 25. Ricklin ME, García-Nicolás O, Brechbühl D, Python S, Zumkehr B, Nougairede A, et  
399 al. Vector-free transmission and persistence of Japanese encephalitis virus in pigs. *Nature*  
400 *communications*. 2016;7:10832.
- 401 26. Van den Hurk AF, Ritchie SA, Mackenzie JS. Ecology and geographical expansion of  
402 Japanese encephalitis virus. *Annual review of entomology*. 2009;54:17-35.
- 403 27. Mukherjee S, Sengupta N, Chaudhuri A, Akbar I, Singh N, Chakraborty S, et al.  
404 PLVAP and GKN3 are two critical host cell receptors which facilitate Japanese encephalitis  
405 virus entry into neurons. *Scientific reports*. 2018;8(1):11784.
- 406 28. Méndez V, Avelar E, Morales A, Cervantes M, Araiza A, González D. A rapid  
407 protocol for purification of total RNA for tissues collected from pigs at a slaughterhouse.  
408 *Genetics and molecular research: GMR*. 2011;10(4):3251-5.
- 409 29. Thompson JD, Higgins DG, Gibson TJ. CLUSTAL W: improving the sensitivity of  
410 progressive multiple sequence alignment through sequence weighting, position-specific gap  
411 penalties and weight matrix choice. *Nucleic acids research*. 1994;22(22):4673-80.
- 412 30. Tamura K, Stecher G, Peterson D, Filipowski A, Kumar S. Molecular evolutionary  
413 genetics analysis version 6.0. *Mol Biol Evol*. 2013;30(12):2725-9.
- 414 31. Saitou N, Nei M. The neighbor-joining method: a new method for reconstructing  
415 phylogenetic trees. *Molecular biology and evolution*. 1987;4(4):406-25.

[Type text]

- 416 32. Tamura K, Nei M, Kumar S. Prospects for inferring very large phylogenies by using  
417 the neighbor-joining method. *Proceedings of the National Academy of Sciences*.  
418 2004;101(30):11030-5.
- 419 33. Felsenstein J. Confidence limits on phylogenies: an approach using the bootstrap.  
420 *Evolution*. 1985;39(4):783-91.
- 421 34. Baruah A, Hazarika RA, Barman NN, Islam S, Gulati BR. Mosquito abundance and  
422 pig seropositivity as a correlate of Japanese encephalitis in human population in Assam,  
423 India. *Journal of vector borne diseases*. 2018;55(4):291.
- 424 35. Chai C, Wang Q, Cao S, Zhao Q, Wen Y, Huang X, et al. Serological and molecular  
425 epidemiology of Japanese encephalitis virus infections in swine herds in China, 2006–2012.  
426 *Journal of veterinary science*. 2018;19(1):151-5.
- 427 36. Conlan JV, Vongxay K, Jarman RG, Gibbons RV, Lunt RA, Fenwick S, et al.  
428 Serologic study of pig-associated viral zoonoses in Laos. *The American journal of tropical*  
429 *medicine and hygiene*. 2012;86(6):1077-84.
- 430 37. Lindahl JF, Ståhl K, Chirico J, Boqvist S, Thu HTV, Magnusson U. Circulation of  
431 Japanese encephalitis virus in pigs and mosquito vectors within Can Tho city, Vietnam. *PLoS*  
432 *neglected tropical diseases*. 2013;7(4):e2153.
- 433 38. Nidaira M, Kyan H, Taira K, Okano S, Oshiro T, Kato T, et al. Survey of Japanese  
434 encephalitis virus in pigs and wild boars on Ishigaki and Iriomote Islands in Okinawa, Japan.  
435 *Epidemiology & Infection*. 2014;142(4):856-60.
- 436 39. Nitatpattana N, Le Flohic G, Thongchai P, Nakgoi K, Palaboodeewat S, Khin M, et  
437 al. Elevated Japanese encephalitis virus activity monitored by domestic sentinel piglets in  
438 Thailand. *Vector-borne and Zoonotic Diseases*. 2011;11(4):391-4.

[Type text]

- 439 40. Van den Hurk AF, Ritchie SA, Johansen CA, Mackenzie JS, Smith GA. Domestic  
440 pigs and Japanese encephalitis virus infection, Australia. *Emerging infectious diseases*.  
441 2008;14(11):1736.
- 442 41. Yamanaka A, Mulyatno KC, Susilowati H, Hendrianto E, Utsumi T, Amin M, et al.  
443 Prevalence of antibodies to Japanese encephalitis virus among pigs in Bali and East Java,  
444 Indonesia, 2008. *Jpn J Infect Dis*. 2010;63(1):58-60.
- 445 42. Yap G, Lim XF, Chan S, How CB, Humaidi M, Yeo G, et al. Serological evidence of  
446 continued Japanese encephalitis virus transmission in Singapore nearly three decades after  
447 end of pig farming. *Parasites & vectors*. 2019;12(1):244.
- 448 43. Bhattacharyya D, Handique R, Dutta L, Dutta P, Doloi P, Goswami B, et al. Host  
449 feeding patterns of *Culex vishnui* sub group of mosquitoes in Dibrugarh district of Assam.  
450 *Journal of communicable diseases*. 1994;26:133-.
- 451 44. Mwandawiro C, Tuno N, Suwonkerd W, Tsuda Y, YANAGI T, Takagi M. Host  
452 preference of Japanese encephalitis vectors in Chiangmai, Northern Thailand. *Medical*  
453 *Entomology and Zoology*. 1999;50(4):323-33.
- 454 45. Chauhan A, Patel B, Maurya R, Kumar S, Shukla S, Subodh K. Pig production  
455 system as a source of livelihood in Indian scenario: An overview. *Intl J Sci Environ Tech*.  
456 2016;5(4):2089-96.
- 457 46. Chevalier V, Cappelle J, Duong V, Fontenille D, Duboz R. How much does direct  
458 transmission between pigs contribute to Japanese Encephalitis virus circulation? A modelling  
459 approach in Cambodia. *PloS one*. 2018;13(8):e0201209.
- 460 47. Wu R, Wang Q, Liu H, Chai C, He B, Huang X, et al. Phylogenetic analysis reveals  
461 that Japanese encephalitis virus genotype III is still prevalent in swine herds in Sichuan  
462 province in China. *Archives of virology*. 2016;161(6):1719-22.

## 463 **Supporting information captions**

[Type text]

464 S1A Table. District-wise distribution of the positive JEV cases by RT-PCR from the pig  
465 serum samples collected during the study period. (DOC)

466 S1B Table. District-wise distribution of the positive JEV cases by RT-PCR from the pig  
467 tonsil samples collected during the study period. (DOC)

468 S2 Table. Accession numbers for the positive serum and tonsil samples from three different  
469 States of India. (DOC)

470 S3A Table. Amino acid substitutions in the envelope (E) gene of the studied JEV genotype I  
471 (GI) strain in comparison to the prototype strain. (DOC)

472 S3B Table. Amino acid substitutions in the envelope (E) gene of the studied JEV genotype III  
473 (GIII) strains in comparison to the prototype Nakayama strain. (DOC)

474 S1A Fig. Alignments of JEV E amino acid sequences of GI strain detected in the study in  
475 comparison to strains isolated from mosquito and human from China and India respectively.  
476 Conserved amino acids are kept as star marked. The substitution mutations are represented in  
477 colour with highlight (DOC).

478 S1B Fig. Alignments of JEV E amino acid sequences of GIII strain detected in the study in  
479 comparison to prototype Nakayama strain. Conserved amino acids are kept as star marked.  
480 The substitution mutations are represented in colour with highlight. (DOC)

481

482

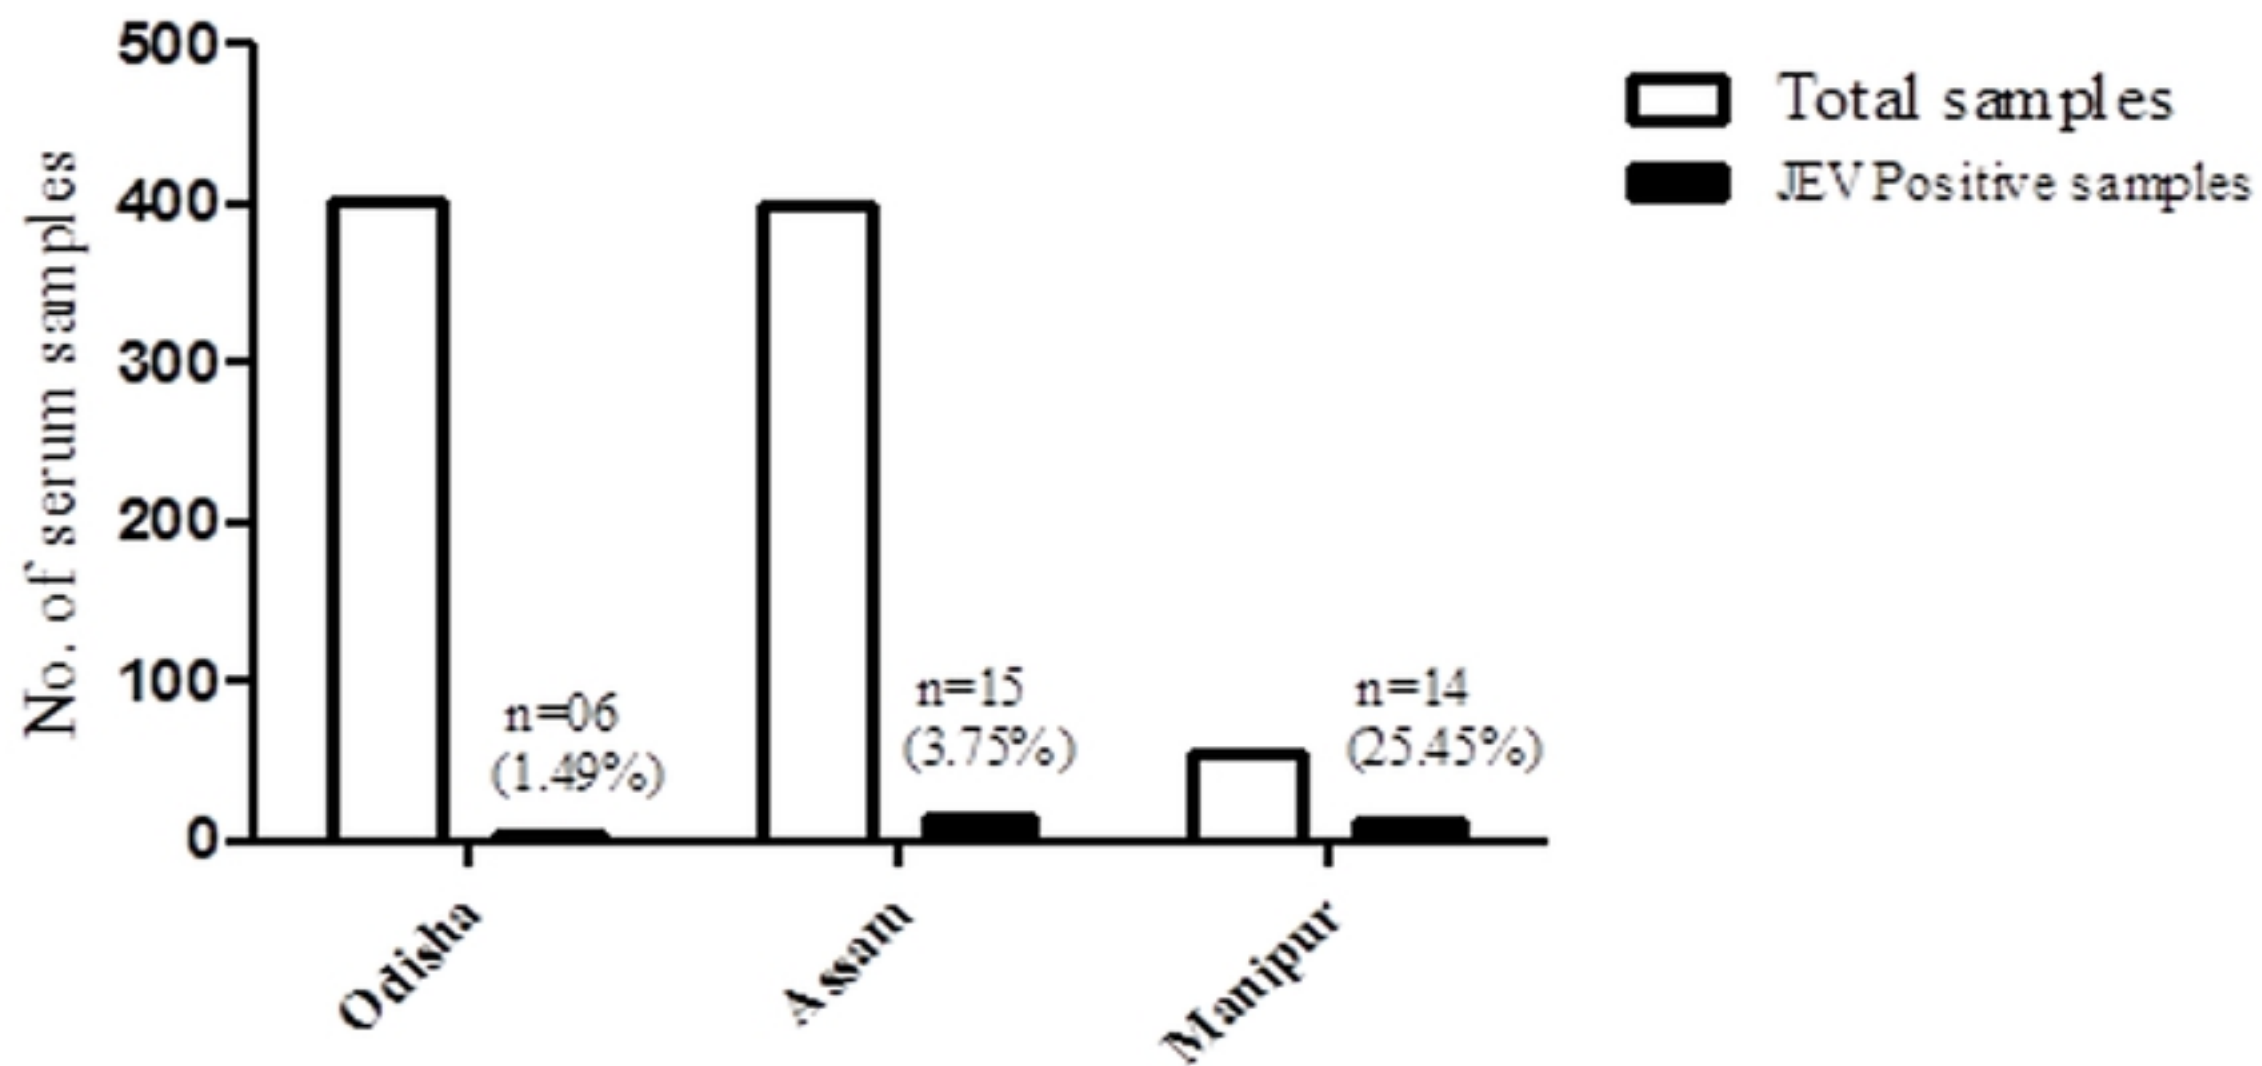

Figure 2A

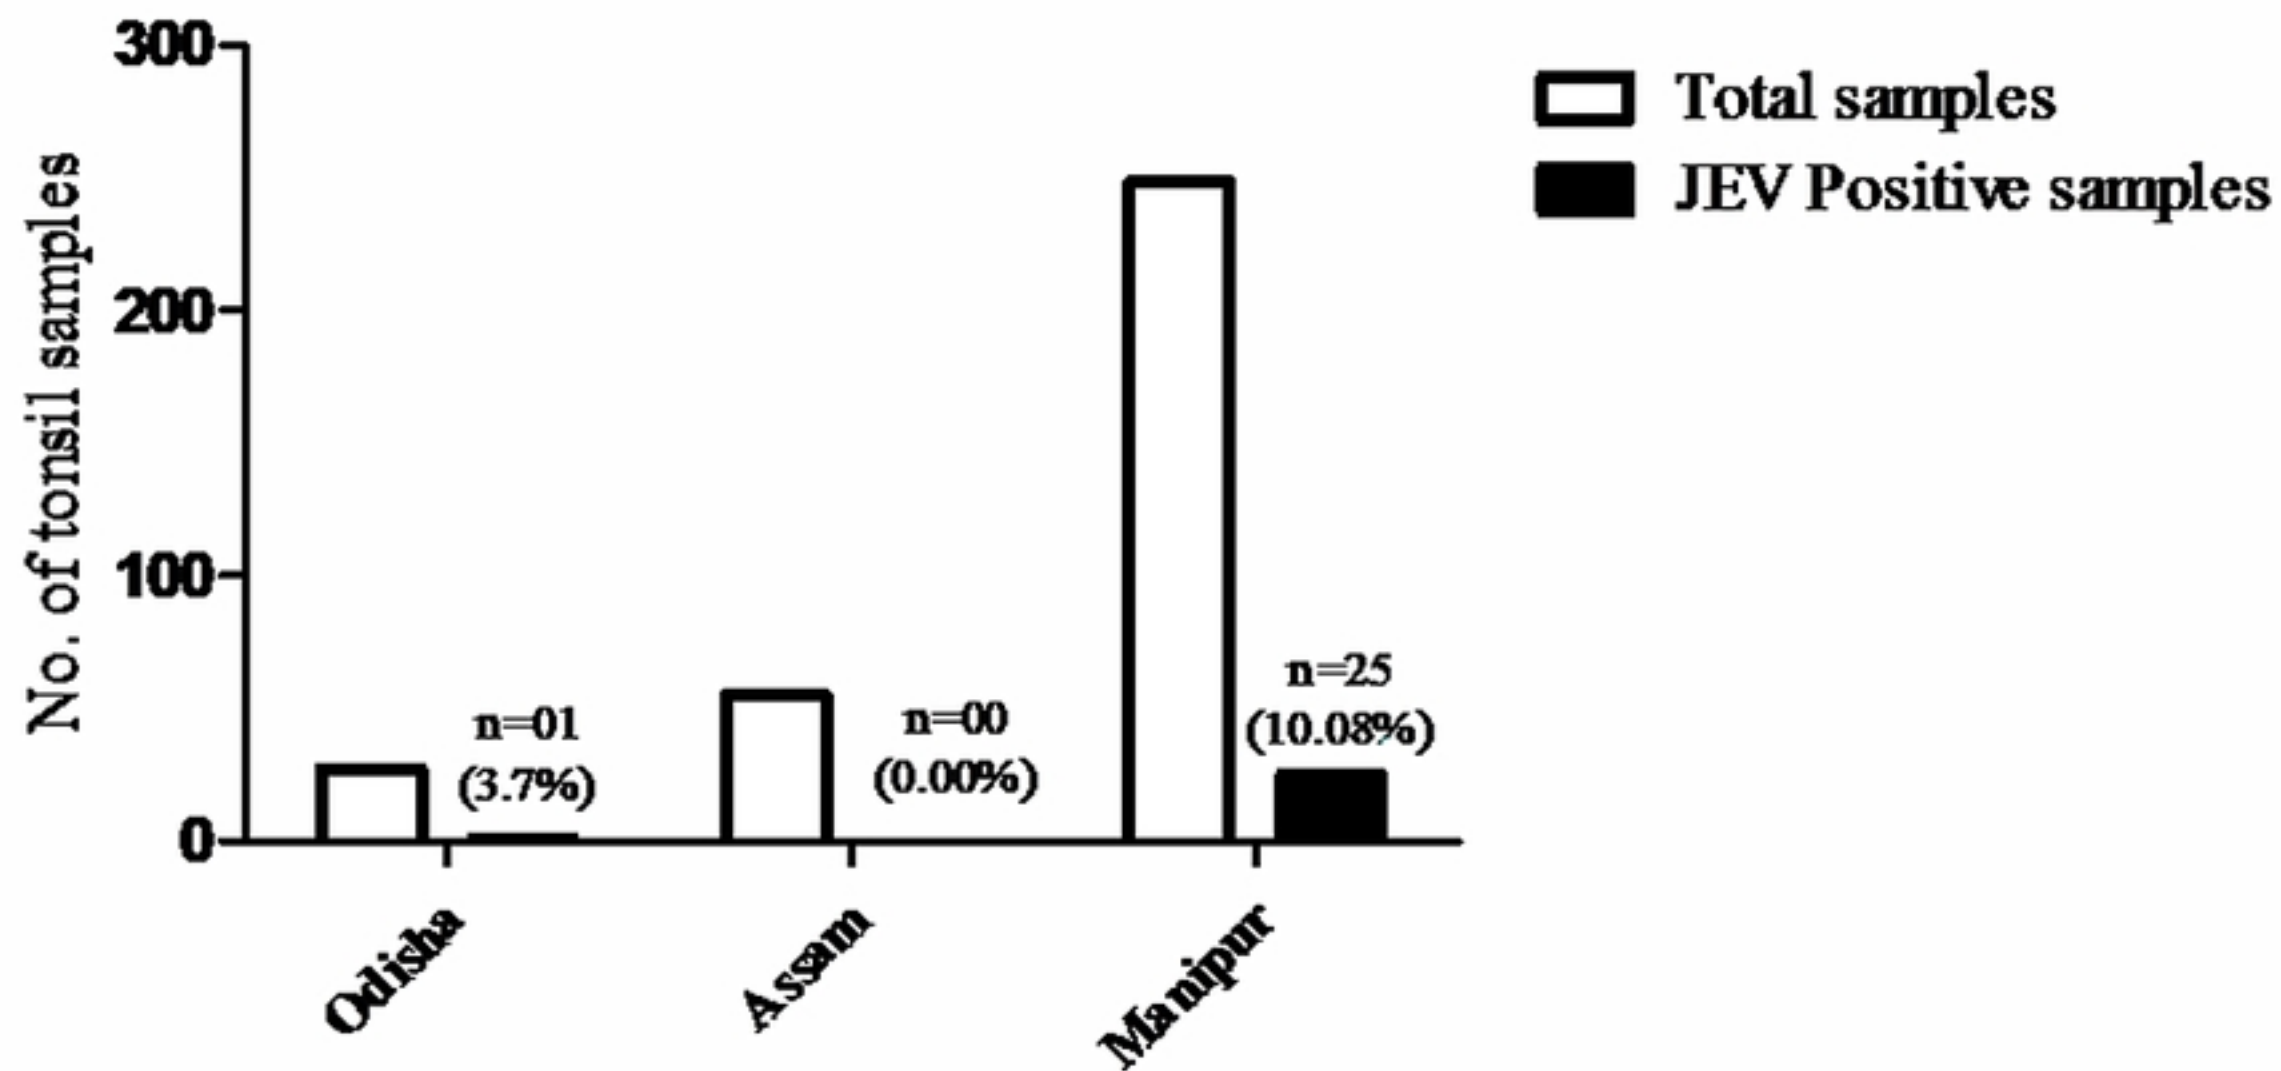

Figure 2B

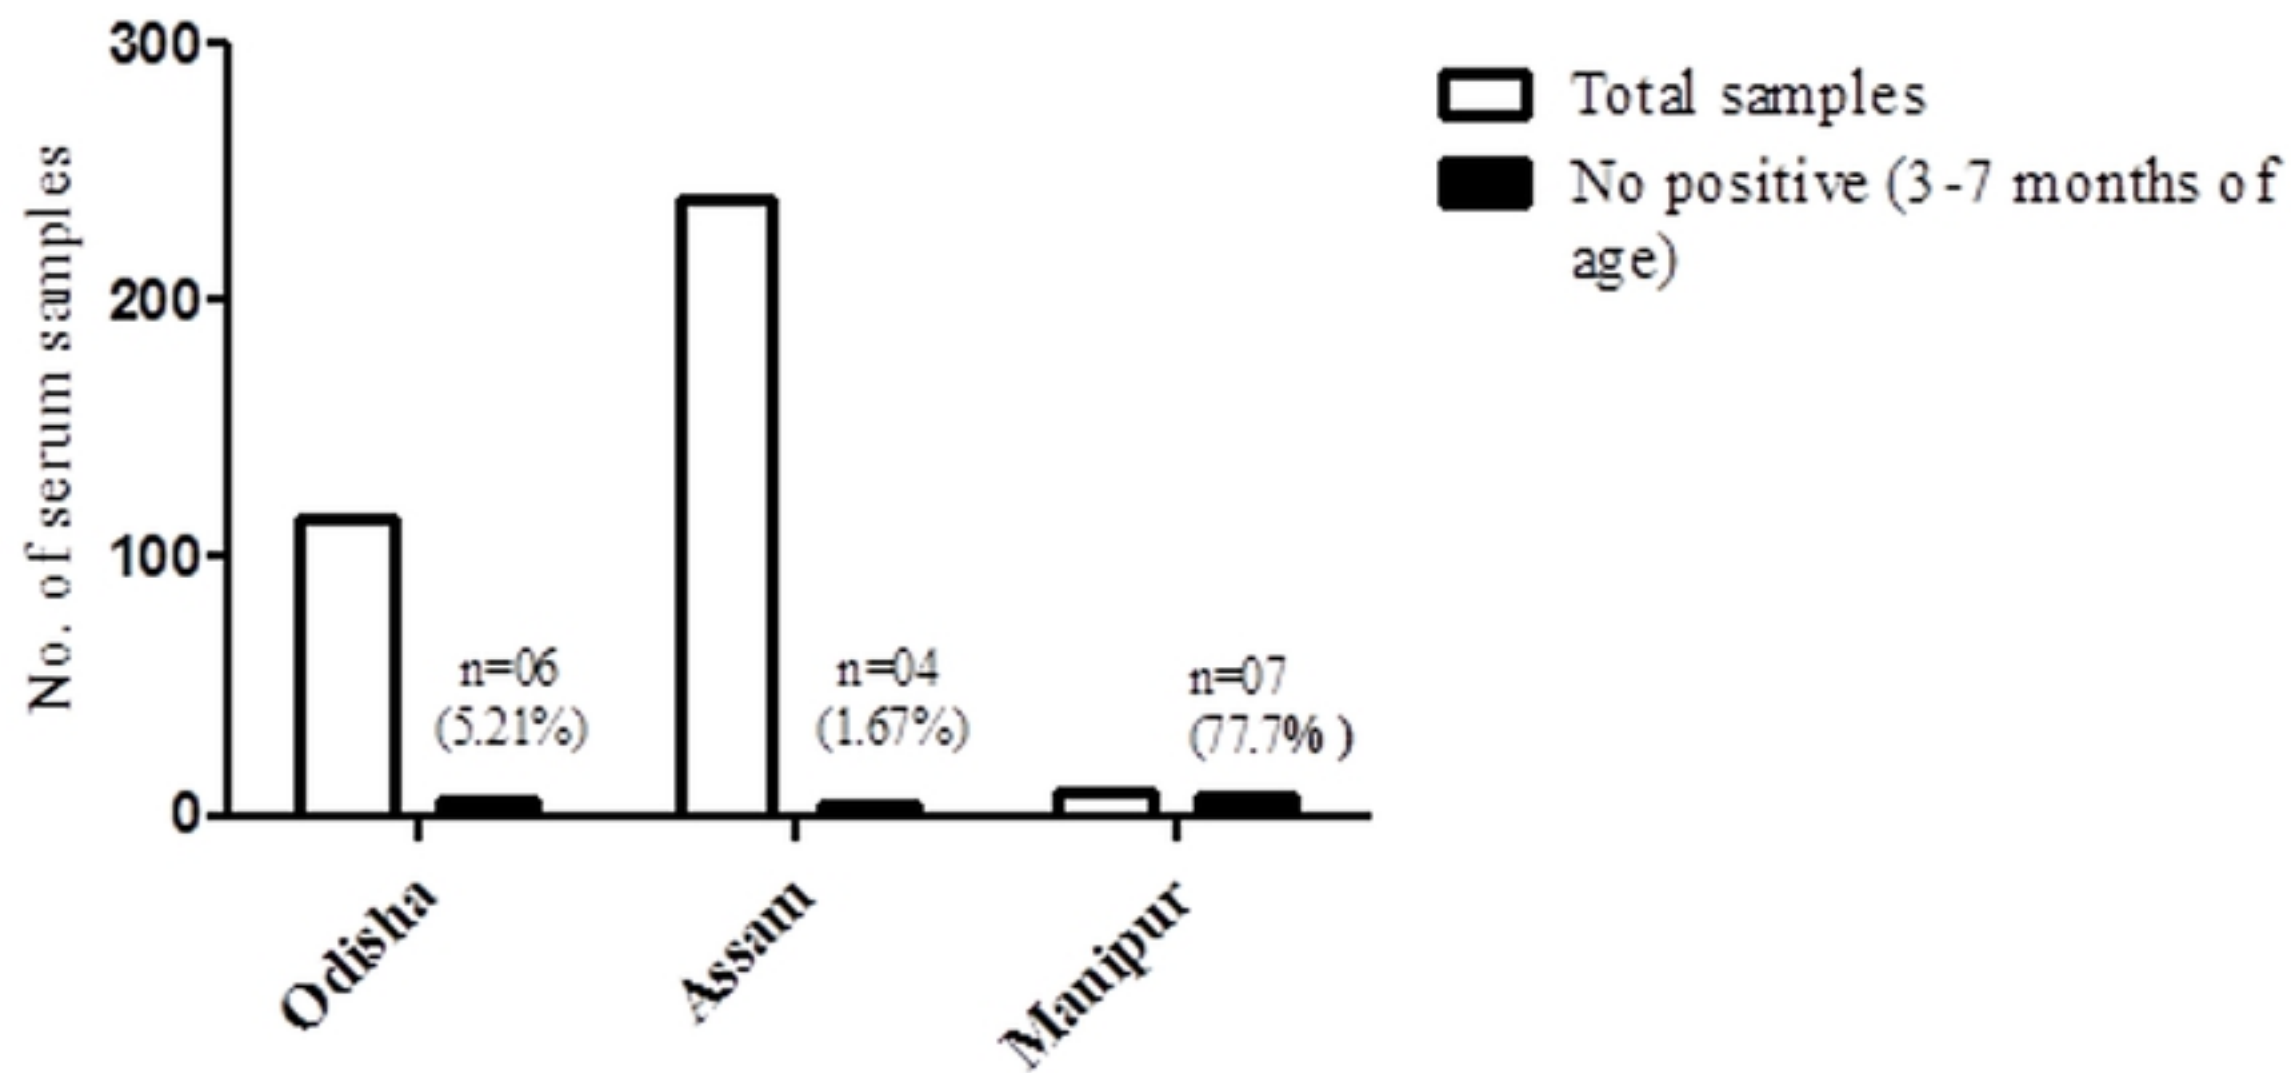

Figure 3A



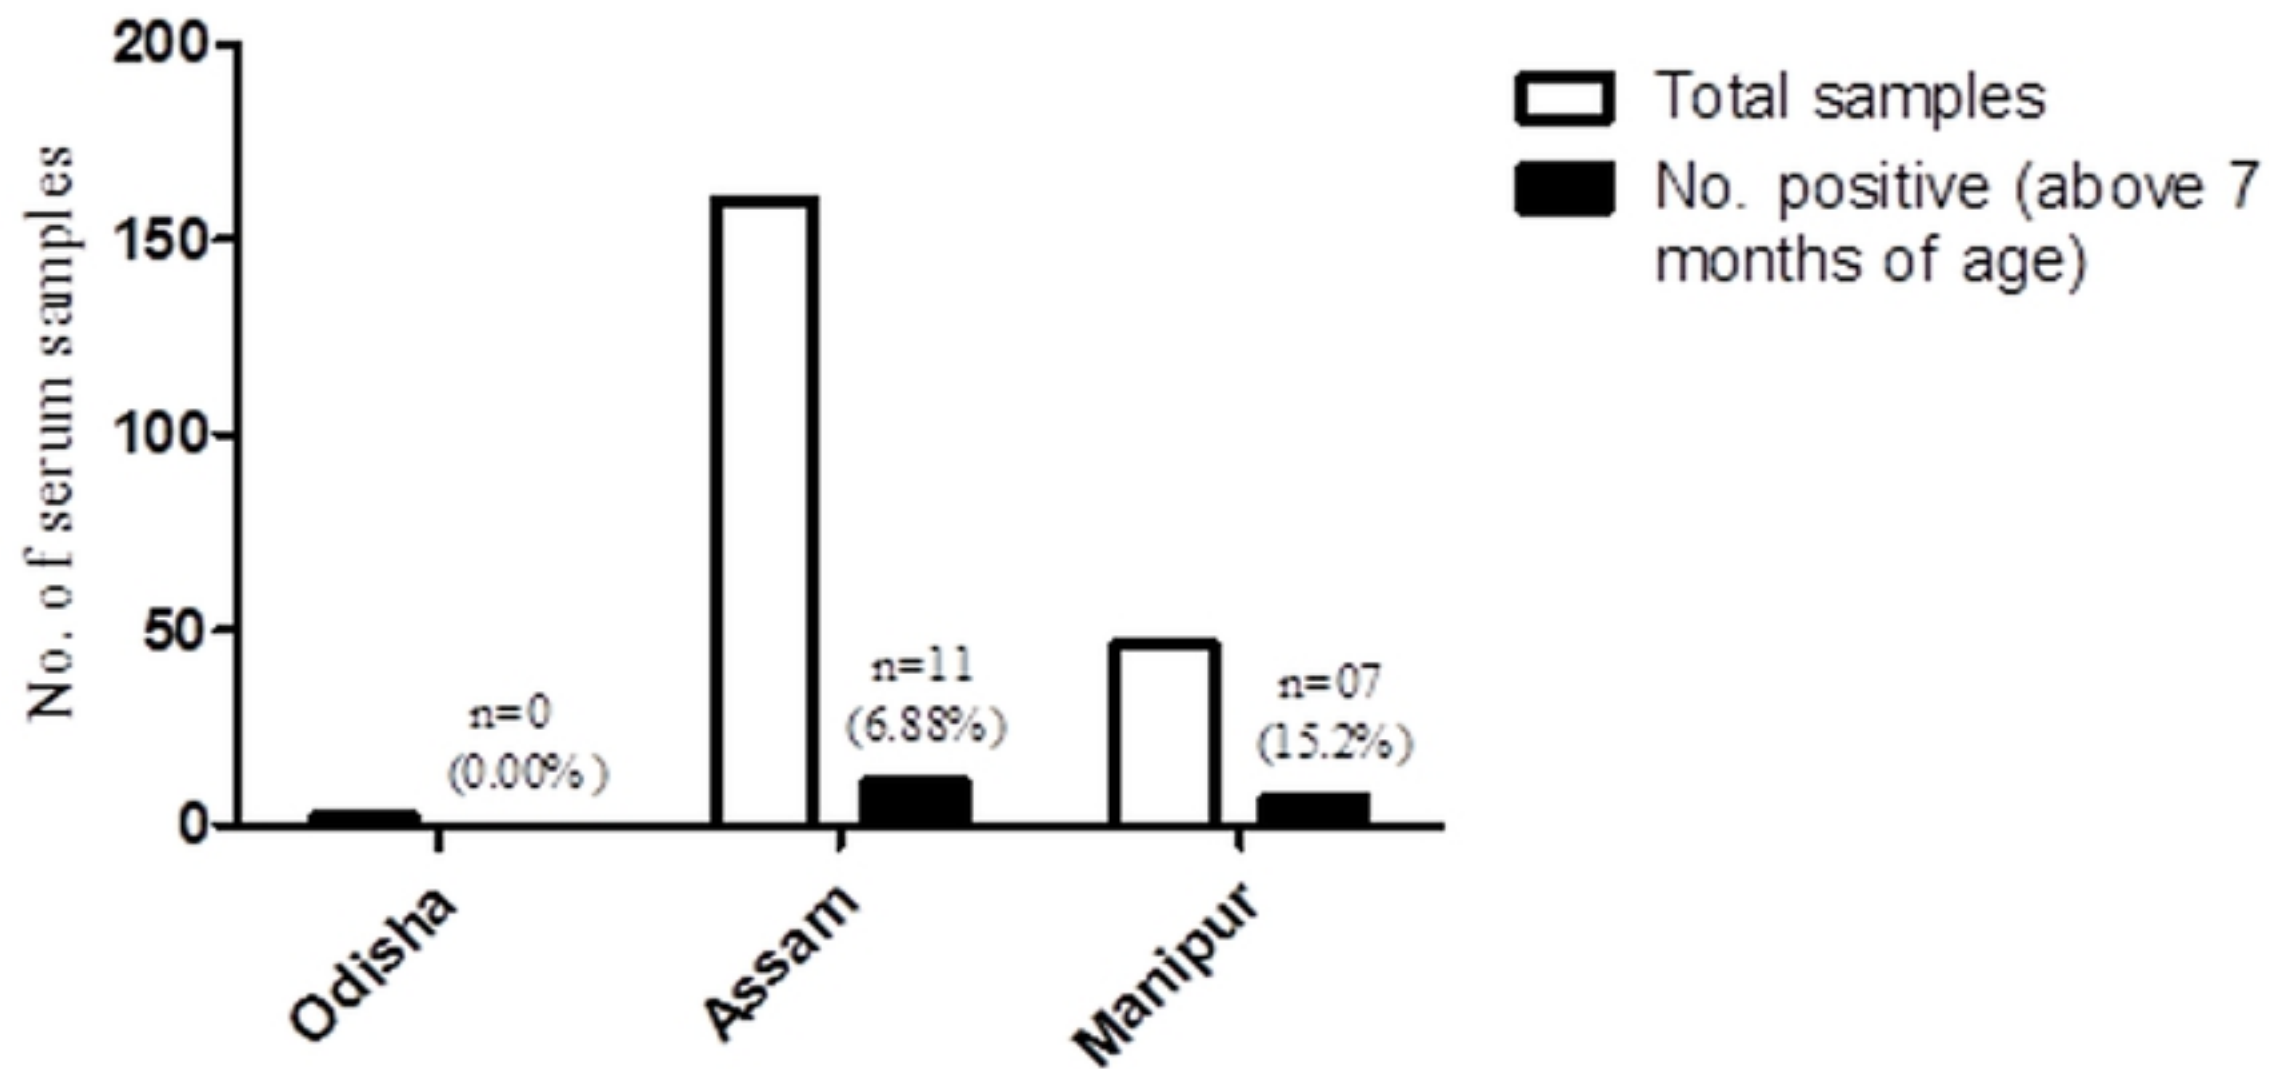

Figure 3B

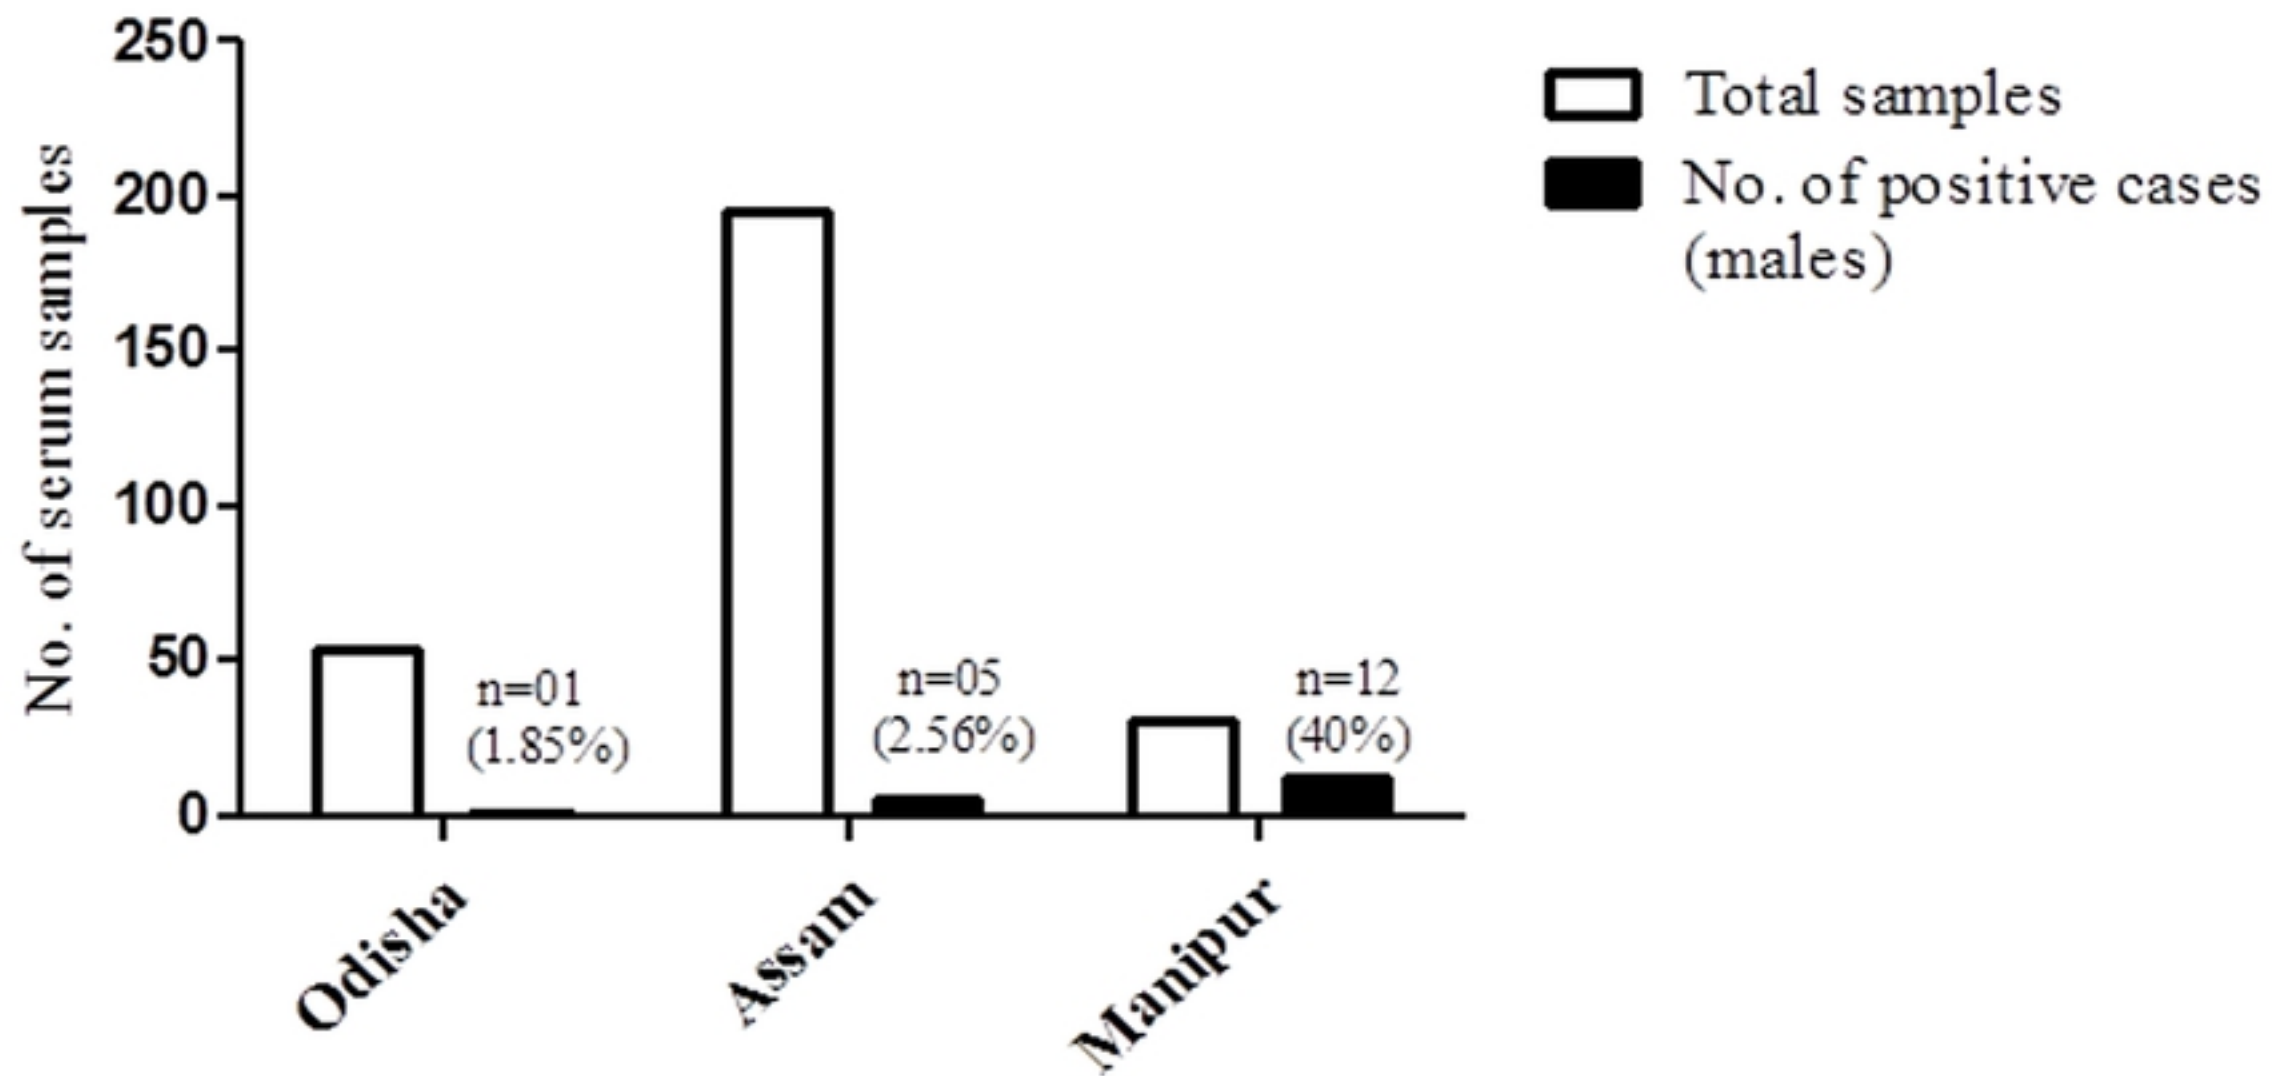

Figure 4A

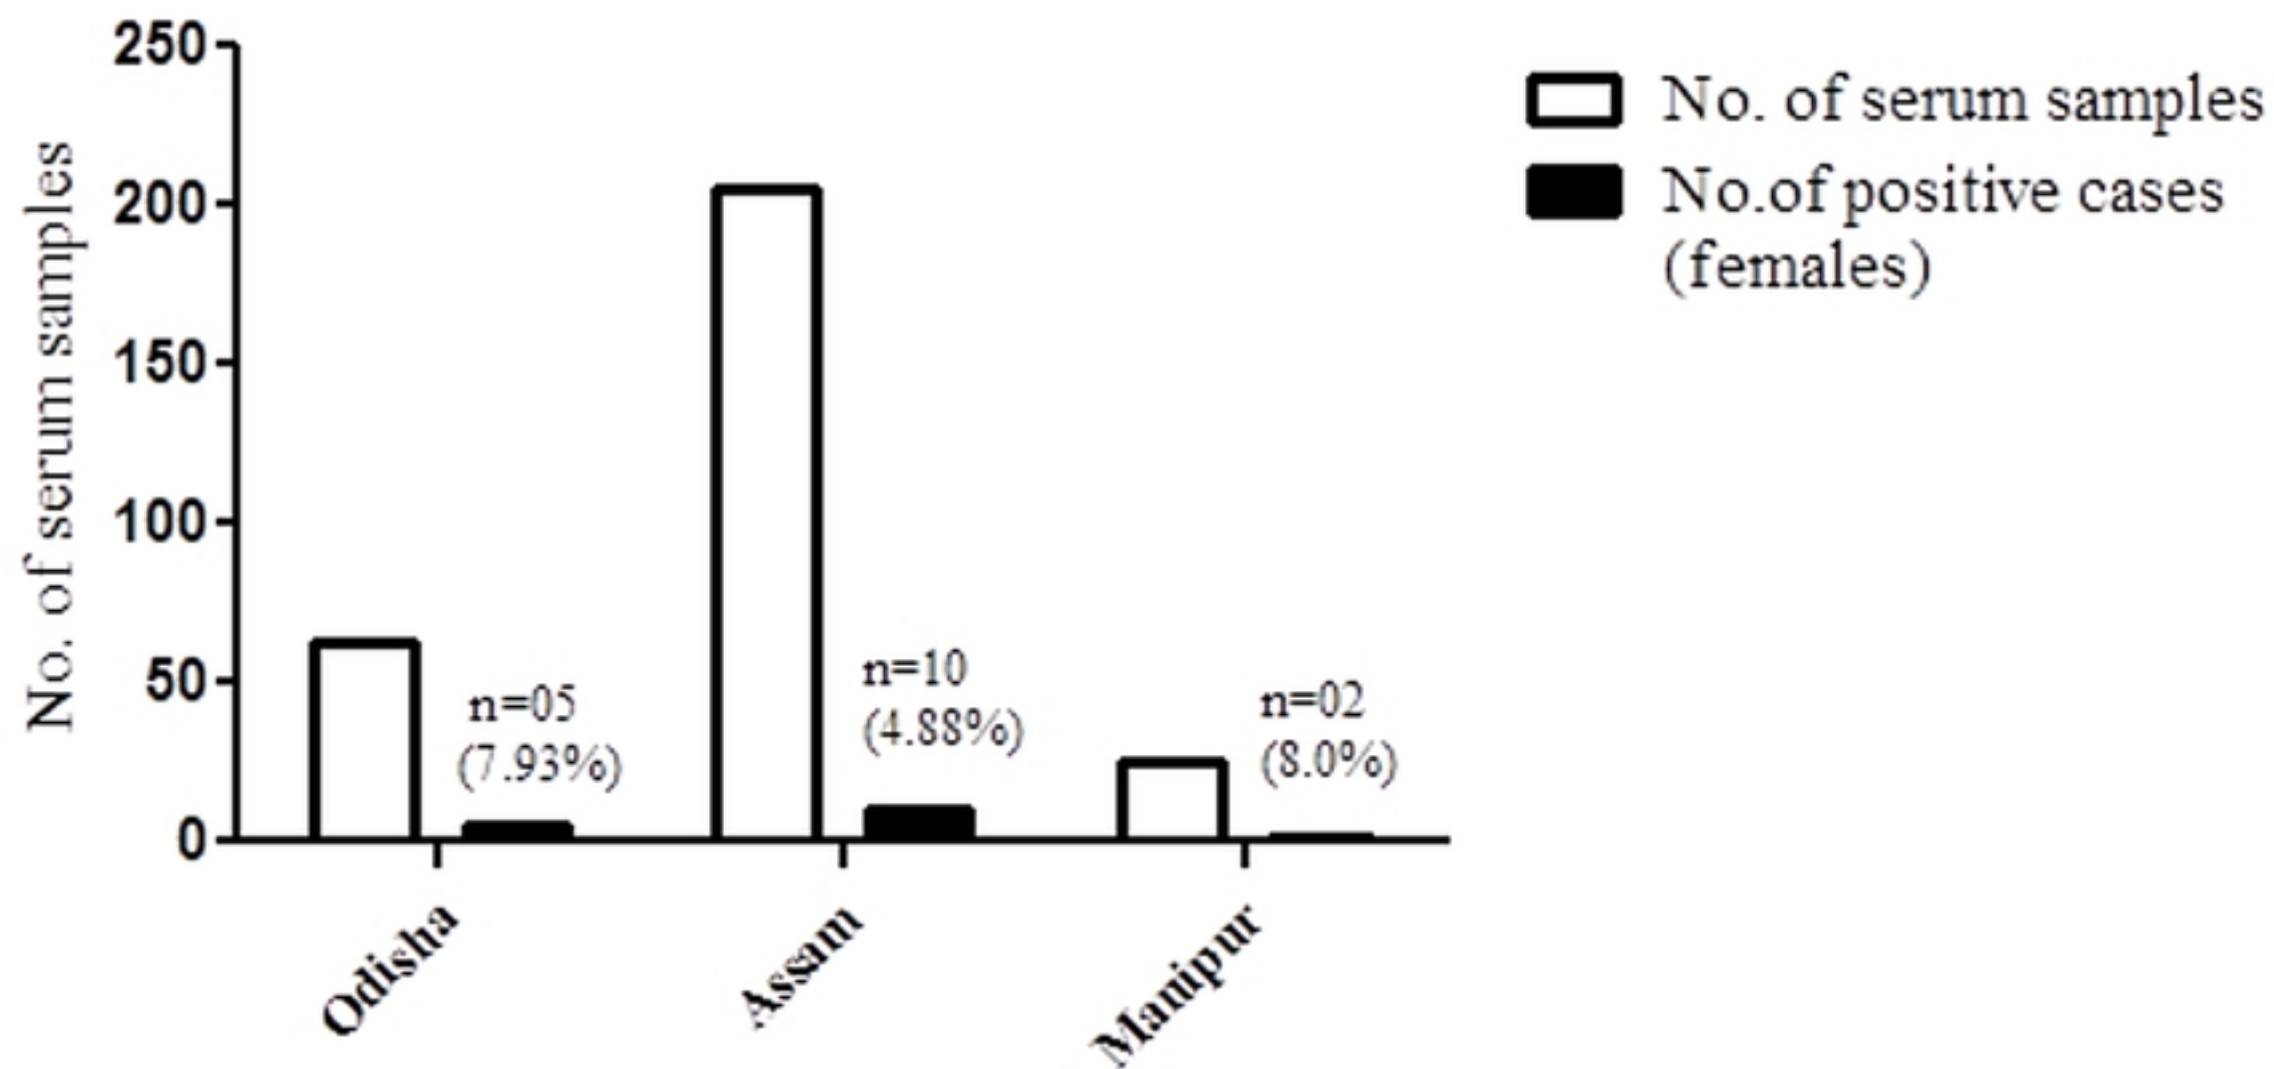

Figure 4B

●:- Odisha isolate  
 ▲:- Assam isolate  
 □:- Manipur isolate

bioRxiv preprint doi: <https://doi.org/10.1101/818070>; this version posted October 24, 2019. The copyright holder for this preprint (which was not certified by peer review) is the author/funder, who has granted bioRxiv a license to display the preprint in perpetuity. It is made available under aCC-BY 4.0 International license.

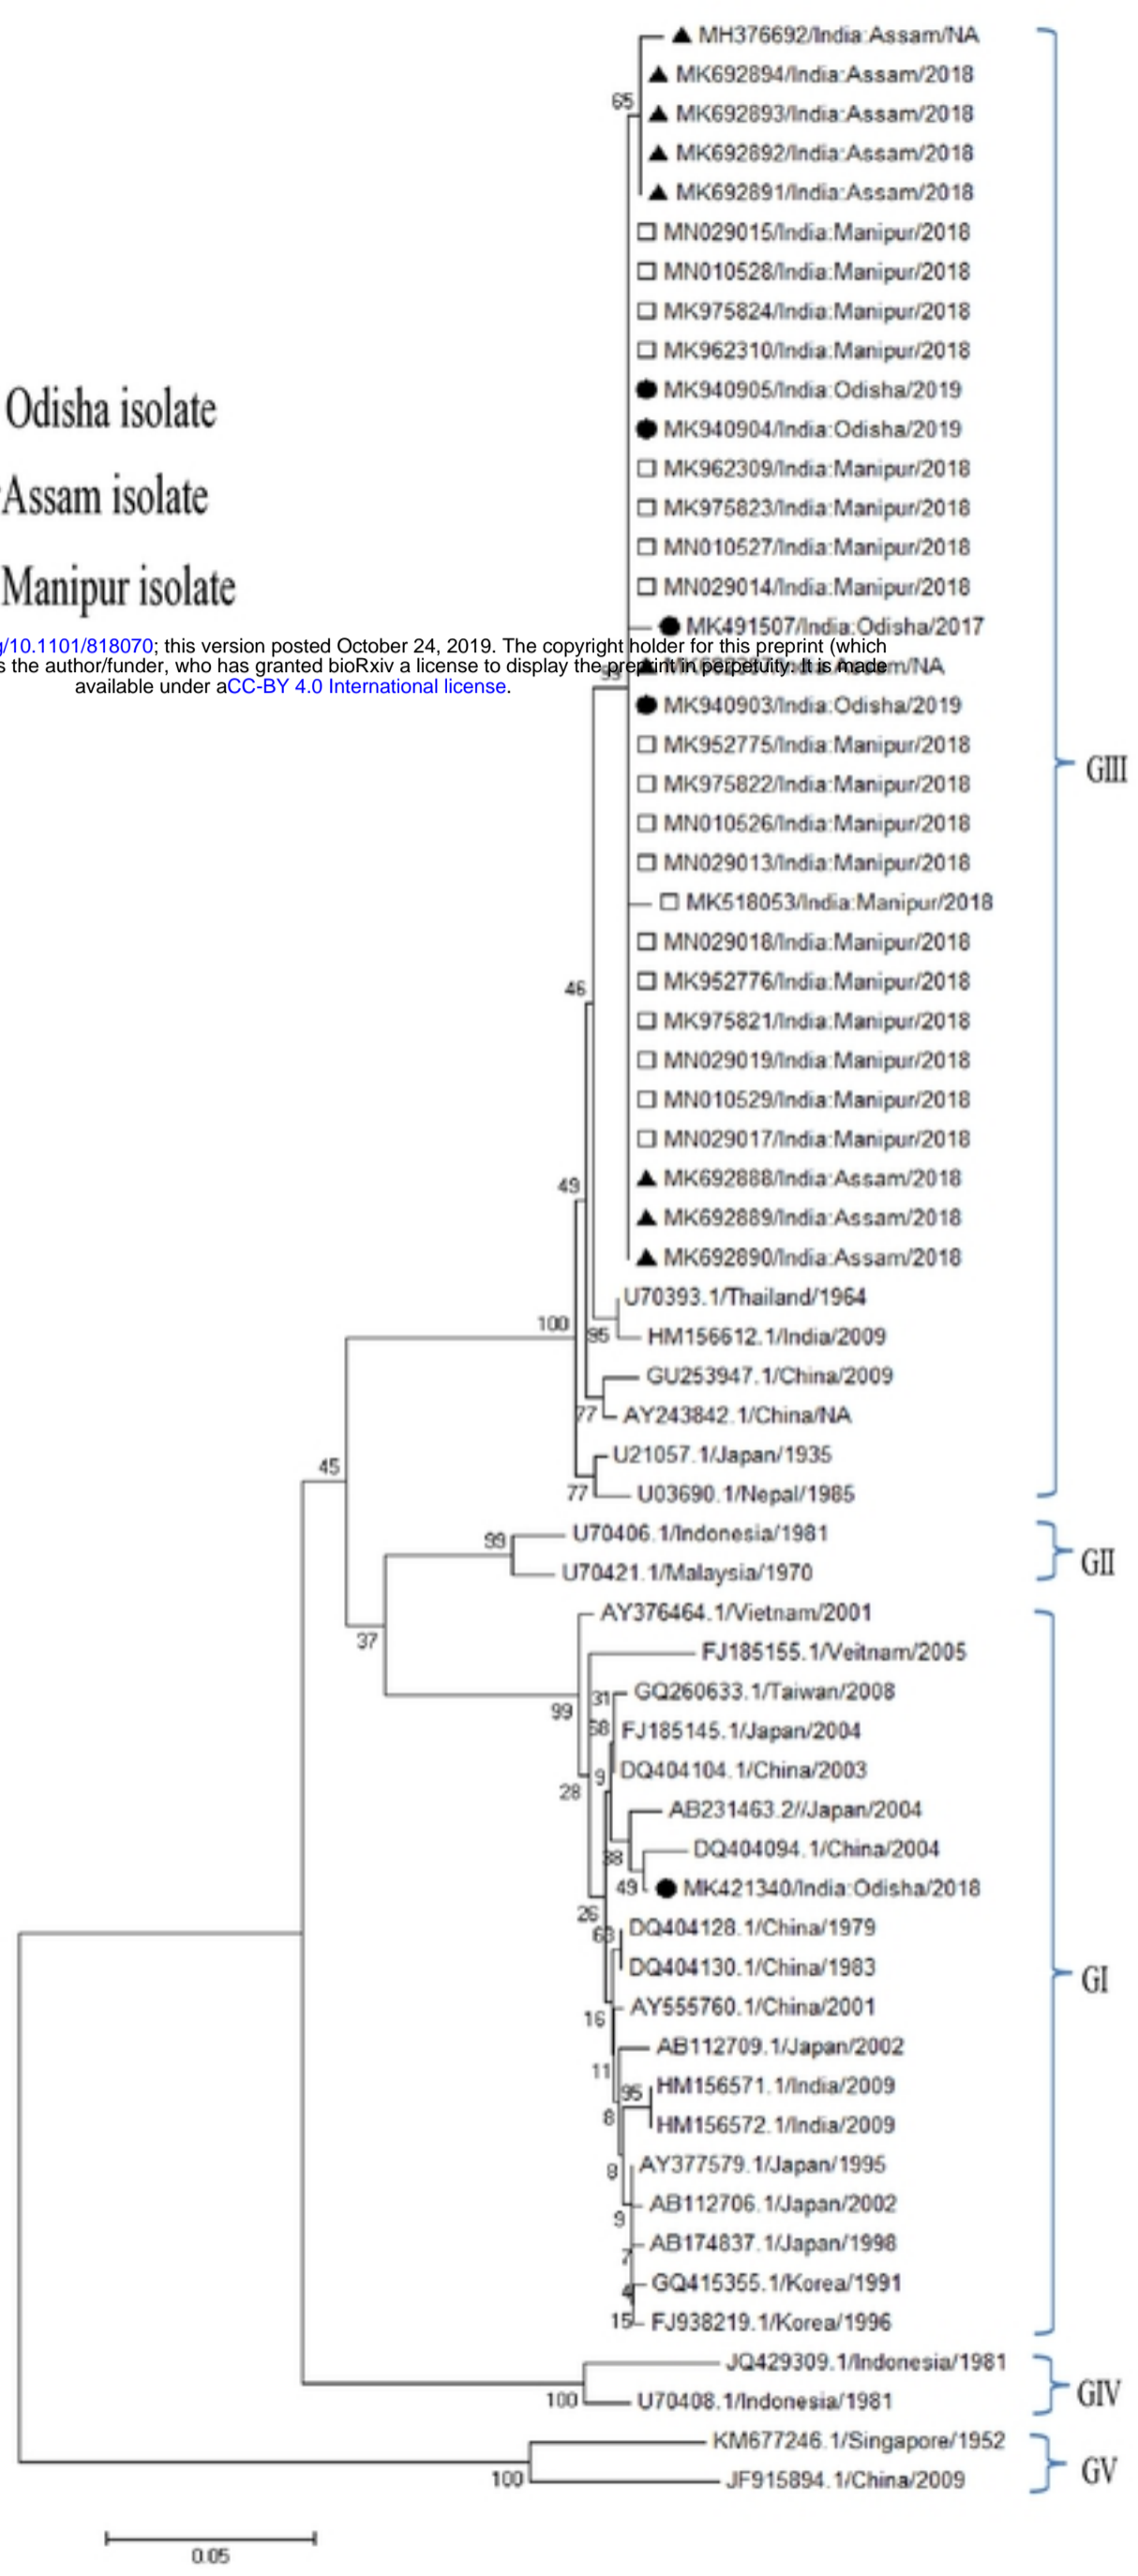

Figure 5

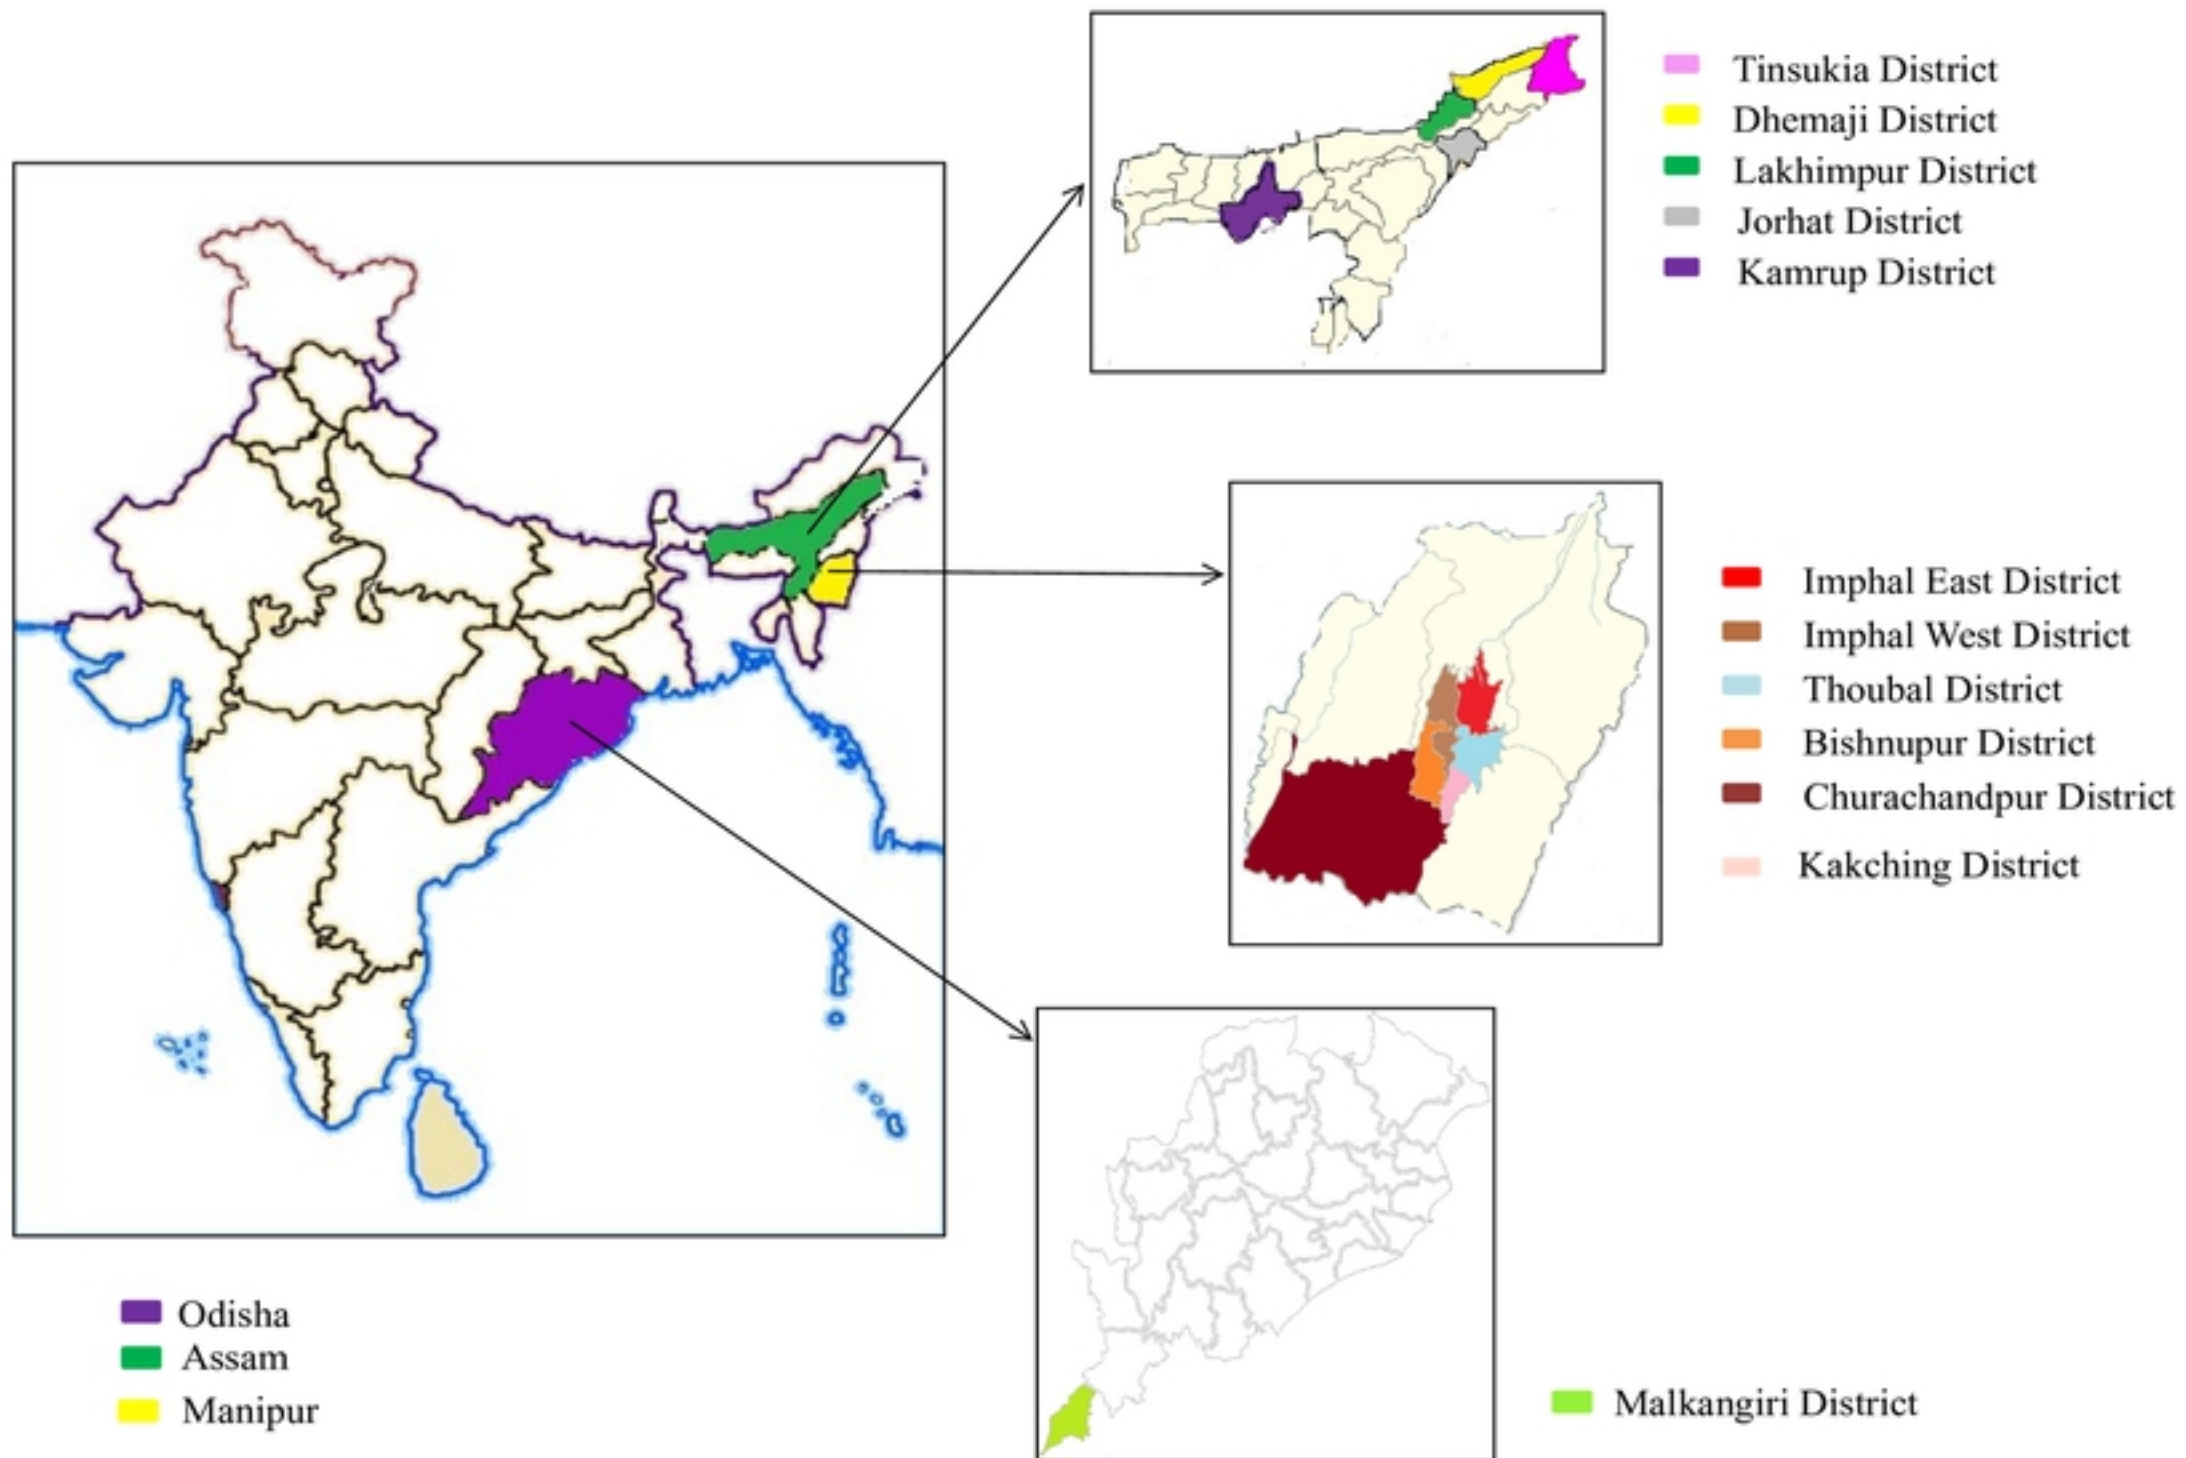

Figure 1

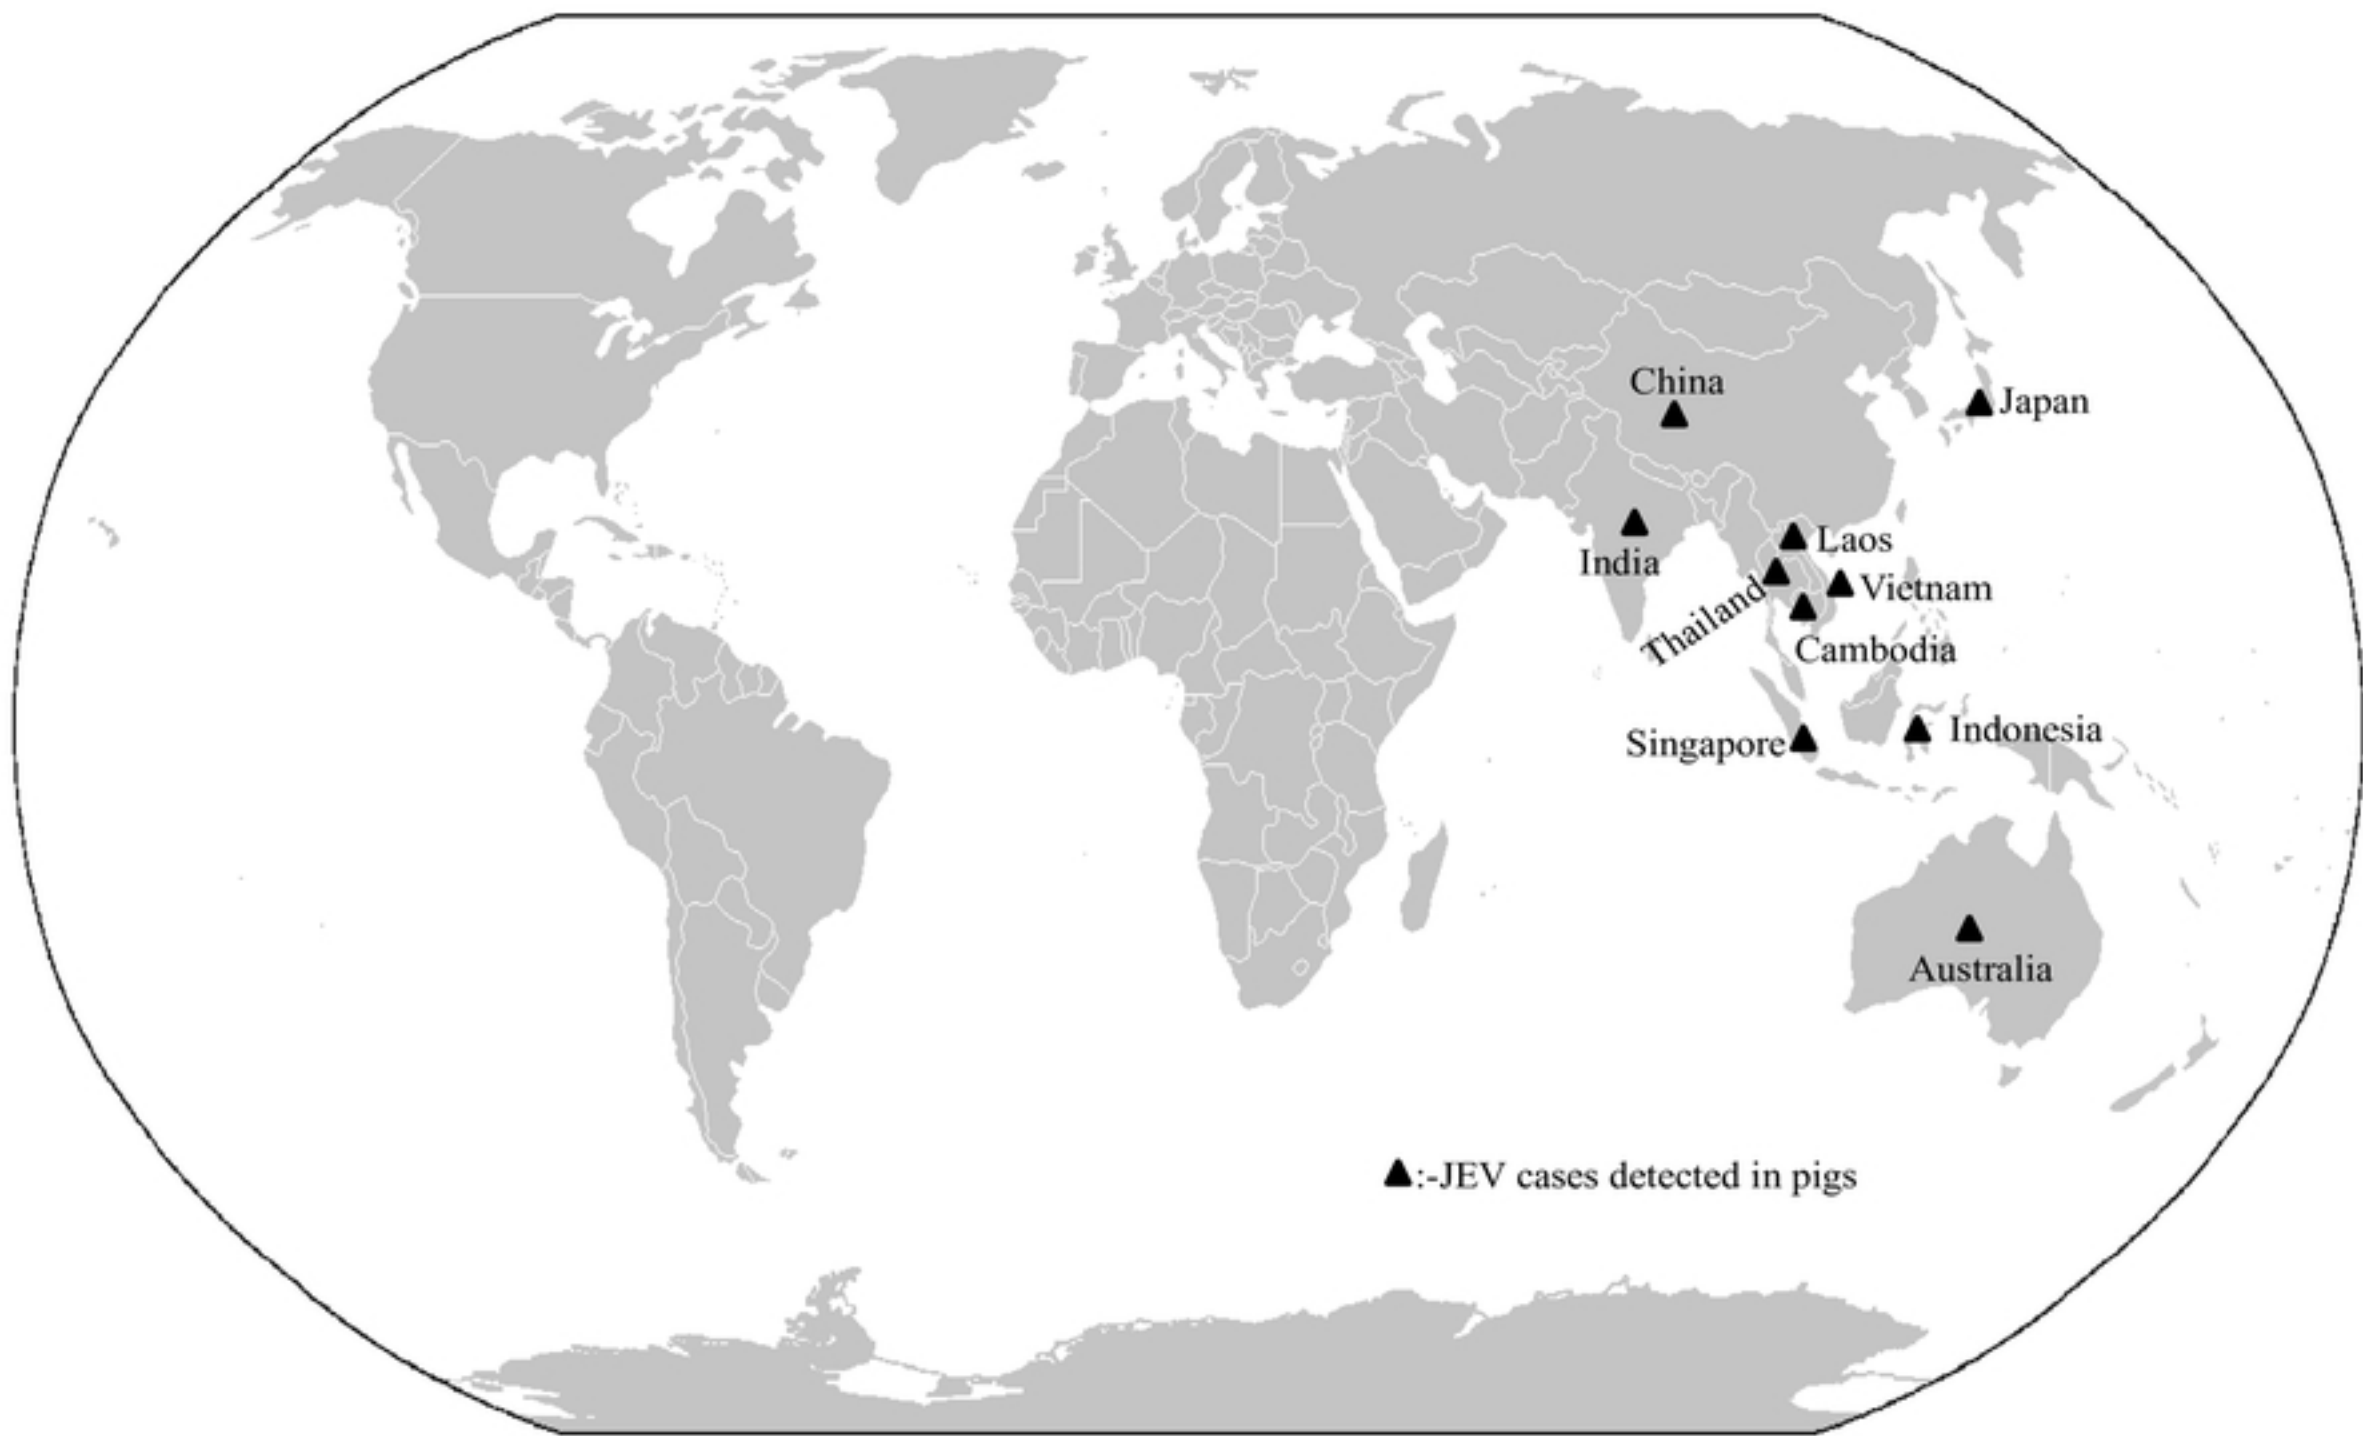

Figure 6
